1 ***Dyrk1a* gene dosage in glutamatergic neurons has key effects in cognitive**  
2 **deficits observed in mouse models of MRD7 and Down syndrome**

3

4 **Authors**

5 Véronique **Brault**<sup>1</sup>, Thu Lan **Nguyen**<sup>1</sup>, Javier **Flores-Gutiérrez**<sup>1</sup>, Giovanni **Iacono**<sup>2</sup>, Marie-  
6 Christine **Birling**<sup>3</sup>, Valérie **Lalanne**<sup>3</sup>, Hamid **Méziane**<sup>3</sup>, Antigoni **Manousopoulou**<sup>4,&</sup>,  
7 Guillaume **Pavlovic**<sup>3</sup>, Loïc **Lindner**<sup>3</sup>, Mohammed **Selloum**<sup>1</sup>, Tania **Sorg**<sup>1</sup>, Eugene **Yu**<sup>5</sup>, Spiros  
8 **D. Garbis**<sup>4,&</sup> and Yann **Hérault**<sup>1,3\*</sup>

9

10 **Affiliations**

11 <sup>1</sup> Université de Strasbourg, CNRS, INSERM, Institut de Génétique et de Biologie Moléculaire  
12 et Cellulaire, IGBMC, 1 rue Laurent Fries, 67404 Illkirch, France

13 <sup>2</sup>Department of Molecular Biology, Radboud Institute for Molecular Life Sciences, Radboud  
14 University, Nijmegen, the Netherlands.

15 <sup>3</sup> CELPHEDIA, PHENOMIN Université de Strasbourg, CNRS, INSERM, Institut Clinique de  
16 la Souris, 1 rue Laurent Fries, 67404 Illkirch, France

17 <sup>4</sup>Institute for Life Sciences, University of Southampton, School of Medicine, Southampton,  
18 UK;

19 <sup>&</sup> Current Address: Proteas Bioanalytics Inc., BioLabs at The Lundquist Institute, Torrance,  
20 90502 CA, USA.

21 <sup>5</sup>The Children's Guild Foundation Down Syndrome Research Program, Genetics and Genomics  
22 Program and Department of Cancer Genetics and Genomics, Roswell Park Comprehensive  
23 Cancer Center, Buffalo, NY, USA; Genetics, Genomics and Bioinformatics Program, State  
24 University of New York At Buffalo, Buffalo, NY, USA.

25

26 **\*Corresponding author: Yann Hérault**

27 Phone: +33 388655657

28 Fax: +33 388655690

29 E-mail: [herault@igbmc.fr](mailto:herault@igbmc.fr)

30

31 **Keywords:** DYRK1A, Down syndrome, MRD7, mouse models, glutamatergic neurons,  
32 memory

33

34 **Abstract**

35 Perturbation of the excitation/inhibition (E/I) balance leads to neurodevelopmental  
36 diseases including to autism spectrum disorders, intellectual disability, and epilepsy. Mutation  
37 in the *DYRK1A* gene located on human chromosome 21 (Hsa21) leads to an intellectual  
38 disability syndrome associated with microcephaly, epilepsy, and autistic troubles (MRD7).  
39 Overexpression of DYRK1A, on the other hand, has been linked with learning and memory  
40 defects observed in people with Down syndrome (DS). *Dyrk1a* is expressed in both  
41 glutamatergic and GABAergic neurons, but its impact on each neuronal population has not yet  
42 been elucidated. Here we investigated the impact of *Dyrk1a* gene copy number variation in  
43 glutamatergic neurons using a conditional knockout allele of *Dyrk1a* crossed with the  
44 Tg(Camk2-Cre)4Gsc transgenic mouse. We explored this genetic modification in  
45 homozygotes, heterozygotes and combined with the Dp(16Lipi-Zbtb21)1Yey trisomic mouse  
46 model to unravel the consequence of *Dyrk1a* dosage from 0 to 3, to understand its role in normal  
47 physiology, and in MRD7 and DS. Overall, *Dyrk1a* dosage in glutamatergic neurons did not  
48 impact locomotor activity, working memory or epileptic susceptibility, but revealed that  
49 *Dyrk1a* is involved in long-term explicit memory. Molecular analyses pointed at a deregulation

50 of transcriptional activity through immediate early genes and a role of DYRK1A at the  
51 glutamatergic post-synapse by deregulating and interacting with key post-synaptic proteins  
52 implicated in mechanism leading to long-term enhanced synaptic plasticity. Altogether, our  
53 work gives important information to understand the action of DYRK1A inhibitors and have a  
54 better therapeutic approach.

55  
56

## 57 **Author summary**

58 The Dual Specificity Tyrosine Phosphorylation Regulated Kinase 1A, DYRK1A, drives  
59 cognitive alterations with increased dose in Down syndrome (DS) or with reduced dose in  
60 mental retardation disease 7 (MRD7). Here we report that specific and complete loss of *Dyrk1a*  
61 in glutamatergic neurons induced a range of specific cognitive phenotypes and alter the  
62 expression of genes involved in neurotransmission in the hippocampus. We further explored  
63 the consequences of *Dyrk1a* dosage in glutamatergic neurons on the cognitive phenotypes  
64 observed respectively in MRD7 and DS mouse models and we found specific roles in long-  
65 term explicit memory with no impact on motor activity, short-term working memory, and  
66 susceptibility to epilepsy. Then we demonstrated that DYRK1A is a component of the  
67 glutamatergic post-synapse and interacts with several component such as NR2B and PSD95.  
68 Altogether our work describes a new role of DYRK1A at the glutamatergic synapse that must  
69 be considered to understand the consequence of treatment targeting DYRK1A in disease.

## 70 **Introduction**

71 Down syndrome (DS; Trisomy 21), is the first genetic cause of mental retardation. The  
72 21q22 contains a critical region (named DSCR for “Down syndrome Critical Region”)  
73 associated with most DS features including mental retardation. Among genes present in this  
74 region, the Dual-specificity Tyrosine-(Y)-phosphorylation-Regulated Kinase 1A (*DYRK1A*),

75 the mammalian homologue of the *Drosophila* minibrain (*mnb*) gene that is essential for normal  
76 neurogenesis, is a target for improvement of DS cognition [1]. In addition, Mental Retardation  
77 Disease 7 (MRD7) is caused by mutations, including loss-of-function, in *DYRK1A* [2-7],  
78 making this gene a critical dosage-sensitive gene for cognitive phenotypes.

79 The rodent *Dyrk1a* is expressed in foetal and adult brains in dividing neuronal  
80 progenitors and later in the adult cerebellum, olfactory bulb and hippocampus. DYRK1A is a  
81 serine/threonine kinase with substrates including transcription (CREB, NFAT, STAT3, FKRH),  
82 translation (EIF2Be) and splicing factors (SF2, SF3), protein regulating cell cycle (Cyclin B1  
83 and B2) and apoptosis (Caspase 9, P53), synaptic proteins involved in endocytosis/exocytosis,  
84 intracellular trafficking, dynamic of the actin cytoskeleton (N-WASP), microtubule formation  
85 (MAP1B) and proteins implicated in inter cellular communication (NOTCH, GSK3b). Roles  
86 of DYRK1A have been revealed in brain development and neuronal differentiation via the  
87 control of critical signalling pathways such as AKT, MAPK/ERK and STAT3 or in synaptic  
88 function via the NFAT pathway [8, 9]. Transgenic mice with either excess or haploinsufficiency  
89 of *Dyrk1a* show cognitive deficits like those observed in patients with specific impairment of  
90 hippocampal-dependent learning and memory [10-12].

91 Among the mechanisms proposed to underlie the cognitive deficits in DS is  
92 glutamatergic and GABAergic neurotransmitter dysfunction. Studies of the DS mouse model  
93 Ts65Dn trisomic for about 56% of the human chromosome 21 (Hsa21) syntenic region on  
94 mouse chromosome 16 (Mmu16) have revealed excess GABAergic input leading to reduced  
95 activation of NMDA receptors and reduction of long-term potentiation (LTP) in the  
96 hippocampal CA1 and dentate gyrus (DG) areas [13]. In addition, enhanced hippocampal long-  
97 term depression (LTD) has also been observed in the hippocampi of Ts65Dn mice in response  
98 to sustained activation of excitatory synapses and attributed to excessive signalling via NMDA  
99 receptors [14-16]. Recent evidence supports the contribution of DYRK1A to changes in

100 glutamatergic neurotransmission, with a BAC transgenic mouse line overexpressing *Dyrk1a*,  
101 showing alterations in glutamatergic synaptic proteins and normalization of *Dyrk1a* in Ts65Dn  
102 mice improving synaptic plasticity, GABAergic/glutamatergic balance, learning and memory  
103 [17, 18]. *Dyrk1a* heterozygous knockout mice also present a reduction in the dendritic  
104 arborisation and the spine density of glutamatergic pyramidal neurons of the cerebral cortex  
105 and alterations in glutamatergic and GABAergic synaptic proteins.

106 In this context, we hypothesized that change in the dosage of *Dyrk1a* in glutamatergic  
107 neurons of the hippocampus and cortex of DS and MRD7 mouse models somehow alter their  
108 development and/or normal working in adult brain, leading to the cognitive deficits observed  
109 in DS or *Dyrk1a* haploinsufficiency models. Analysis of DYRK1A function in glutamatergic  
110 neurons using a knockout approach is not possible as its full KO is homozygote lethal [19].  
111 Thus, we decided to change the gene dosage of *Dyrk1a* in glutamatergic neurons either in a  
112 disomic (inactivation of one or two copies of *Dyrk1a*) or trisomic (going back to two copies of  
113 *Dyrk1a*) context. We selected the Tg(Camk2a-Cre) transgene to target the Cre recombinase in  
114 glutamatergic neurons within the forebrain [20] and we used the Dp(16)1Yey trisomic mouse  
115 model (abbreviated as Dp1Yey) containing a segmental duplication of the 22.9 Mb *Lipi-Zfp295*  
116 region including *Dyrk1a*, to return to two copies of *Dyrk1a* in the glutamatergic neurons of the  
117 Dp1Yey. This model has the advantages to include 65% of Hsa21 mouse gene orthologs and to  
118 be devoid of the 50 DS-irrelevant trisomic genes that are present on the Ts65Dn mini  
119 chromosome [21]. Dp1Yey mice present defects in working memory, long-term episodic  
120 memory, and associative learning. In addition to those tests, we also tested the impact of *Dyrk1a*  
121 gene dosage on the mouse social behaviour as MRD7 patients display autistic traits.

## 122 **Results**

123

### 124 ***Dyrk1a* is expressed in Camk2a-positive cells and its full inactivation in the glutamatergic** 125 **neurons induces brain defects.**

126 *Dyrk1a* is ubiquitously expressed in different neuronal cell populations of the brain but  
127 with regional differences: the protein level being higher in the olfactory bulb, cerebellar cortex,  
128 cortical structures and granular and pyramidal cell layers of the hippocampus [22]. We checked  
129 DYRK1A expression in adult glutamatergic neurons, by co-immunohistochemical localisation  
130 with an antibody against CAMK2A and DYRK1A. In the wild-type adult mouse, both proteins  
131 were found in pyramidal and granular neurons of the hippocampus and dentate gyrus and in  
132 neurons of the cortex (Figure 1A).

133 To better understand the function of DYRK1A in glutamatergic neurons we inactivated  
134 both copies of *Dyrk1a* using a conditional approach, to generate a full knock-out in those  
135 neurons. A floxed *Dyrk1a* allele (*Dyrk1a<sup>cKO</sup>* allele) was designed such that exon 7 that codes  
136 for the serine/threonine protein kinase active site signature domain was flanked by two *loxP*  
137 sites (Figure 1B). We used the Tg(Camk2aCre)4Gsc transgene [20] to generate the  
138 *Dyrk1a<sup>Camk2aCre</sup>* allele (shortened as *Dyrk1a<sup>C</sup>*) and we checked the ability of the Cre to  
139 recombine the *Dyrk1a* floxed allele in *Dyrk1a<sup>Camk2aCre/Camk2aCre</sup>* (recombination of both  
140 *Dyrk1a<sup>cKO</sup>* alleles with the Cre recombinase; noted here *Dyrk1a<sup>C/C</sup>*) mice. The generation of  
141 the deleted allele was detected by PCR analysis exclusively in brain areas where *Camk2a* is  
142 expressed (Figure 1B). Quantification of *Dyrk1a* mRNA in different brain regions confirmed  
143 that *Dyrk1a* is expressed at different relative levels in brain subregions (Figure 1C).  
144 Nevertheless, decrease of the *Dyrk1a* transcripts was found in the hippocampus, cortex and  
145 thalamus/hypophysis but not in the cerebellum of *Dyrk1a<sup>C/C</sup>* mice (Figure 1C). Loss of the  
146 DYRK1A protein was confirmed in the hippocampus by Western blot analysis (Figure 1D) and

147 immunohistology (Figure 1E). This reduction was more evident within the pyramidal cell layers  
148 of the CA1 and CA3 composed mostly of glutamatergic neurons.

149 We analysed the implication of DYRK1A in glutamatergic neurons by looking at brain  
150 morphology and cognitive phenotypes. Brain weight was significantly decreased in *Dyrk1a*<sup>C/C</sup>  
151 mice compared to control mice (90% of the control weight; Figure 2A). Morphometric analysis  
152 at Bregma -1.5 (Figure 2B) unravelled reduced surface area of the total brain surface in  
153 *Dyrk1a*<sup>C/C</sup> mice (~88% of control; Figure 2C). The area of the hippocampus including the  
154 cornus ammonis fields (CA1, CA2 and CA3) and dentate gyrus (DG) did not significantly differ  
155 between the two genotypes (Figure 2D). We measured the thickness of the oriens layer at the  
156 CA1, CA2 and CA3 levels, of the pyramidal layer at the CA1 level, of the radiatum layer, of  
157 the CA1 and DG molecular layers and of the granular layer of the DG and did not find any  
158 difference between control and *Dyrk1a*<sup>C/C</sup> mice (Supplementary figure 1A). We also counted  
159 neurons within the CA1 and did not find any modification in the density of pyramidal neurons  
160 (Supplementary figure 1B). Specific decrease in cortical thickness was observed at the level of  
161 the dorsal motor cortex (~78% of controls, Figure 2E) and of the somatosensory cortex (~76%  
162 of controls, Figure 2E) whereas decrease in thickness at the more ventral auditory cortex level  
163 was not significant (Fig. 2E). Measurements of the thickness of different layers in the  
164 somatosensory cortex (Figure 2F) indicate decrease in the thickness of molecular layer I,  
165 external granular and pyramidal layers II/III, internal pyramidal layer V and internal  
166 polymorphic layer VI (Figure 2G). Only the internal granular layer IV was found unchanged  
167 (Figure 2G). To investigate how change in cellularity might relate to cortical thickness, we  
168 counted the number of cells present in SSC layers II-III, V and VI. We found that cellular  
169 density in layers II-III, V and VI was increased by about 30% in *Dyrk1a*<sup>C/C</sup> mice (Figure 2H)  
170 with the total number of neurons unchanged between *Dyrk1a*<sup>C/C</sup> and controls, suggesting an  
171 impact of *Dyrk1a* inactivation on cell morphology or tissue organization.

172

173 **Full *Dyrk1a* inactivation in the glutamatergic neurons impacts general behaviour and**  
174 **cognition**

175 To analyse mouse behaviour in *Dyrk1a*<sup>C/C</sup> mice, we first focused our attention on  
176 locomotor activity and exploratory activity. Measurement of horizontal, or vertical, locomotor  
177 activity during circadian cycle did not differ in *Dyrk1a*<sup>C/C</sup> mice compared to control mice  
178 (Supplementary figure 2A, B). The analysis of exploratory behaviour in a novel environment  
179 (open field (OF) test) indicated normal locomotor activity for the *Dyrk1a*<sup>C/C</sup> mice  
180 (Supplementary figure 2C) but their exploratory pattern was altered as they spent significantly  
181 more time in the centre of the OF (Figure 3A), suggesting a decreased anxiety. This phenotype  
182 was confirmed in the elevated plus maze with *Dyrk1a*<sup>C/C</sup> mice spending significantly more time  
183 in the open arms than control mice (Figure 3B). In this test, *Dyrk1a*<sup>C/C</sup> mice were also more  
184 active, visiting more arms than the control mice (Figure 3C). The locomotor performance was  
185 assessed in the rotarod task. *Dyrk1a*<sup>C/C</sup> mice exhibited slightly better performance in this test  
186 than their control littermates, with an increase in latency to fall, indicating that motor balance  
187 is not affected in those mice (Figure 3D).

188 Impact of the loss of *Dyrk1a* in glutamatergic neurons on cognition was evaluated using  
189 different memory tests. Working memory was assessed by recording spontaneous alternation  
190 in the Y-maze. The percentage of alternation between the three arms was similar between  
191 *Dyrk1a*<sup>C/C</sup> and control mice (Supplementary figure 2D) indicating a normal working memory  
192 in both genotypes. In this test, the number of visited arms during the 5 min session was not  
193 significantly different in the *Dyrk1a*<sup>C/C</sup> mice compared to the controls, although those mice  
194 showed more variability (Supplementary figure 2E). Long-term explicit memory requiring the  
195 hippocampus and related medial and temporal lobe structures was tested with the novel object  
196 recognition test (NOR) with 24 hours delay. Although *Dyrk1a*<sup>C/C</sup> mice showed as much interest



197 exploring the objects during the presentation session (Figure 3E) and during the discrimination  
198 session (Figure 3F) compared to control animals, they did not make any difference between the  
199 two objects during the retention trial (Figure 3G) by contrast to control mice who spent  
200 significantly more time on the novel object compared to the familiar one. Thus, the NOR test  
201 unravelled a deficit in long-term explicit memory in the *Dyrk1a<sup>C/C</sup>* mice. Then, we tested  
202 associative learning using the contextual fear-conditioning test. During the habituation, mice  
203 showed the same basal level of freezing whatever their genotypes were (Figure 3H,  
204 Habituation). However, *Dyrk1a<sup>C/C</sup>* mice showed significantly less freezing than control mice  
205 during contextual discrimination, indicating poorer performance in contextual learning (Figure  
206 3H, Context). During the cued learning, *Dyrk1a<sup>C/C</sup>* mice responded like control mice to the  
207 conditioned stimulus, indicating normal cued fear (Supplementary figure 2F). As decreased  
208 freezing could be due to a deficit in pain sensitivity rather than a deficit in memory, we tested  
209 the mice in the hot plate test. *Dyrk1a<sup>C/C</sup>* mice had a decreased latency to elicit a first response  
210 to noxious thermal stimulus, suggesting that they were more sensitive to pain than control mice  
211 (Figure 3I). As pain sensitivity was never tested in *Dyrk1a* knock-out heterozygous mice  
212 (shortened as *Dyrk1a<sup>+/-</sup>*), we also tested those mice in the hot plate. We also found that those  
213 mice are more sensitive to pain (Figure 3J).

214 As in Human *DYRK1A* heterozygous mutations lead to autistic behaviour in MRD7,  
215 mouse sociability was investigated in this full inactivation of *Dyrk1a* in the glutamatergic  
216 neurons. We presented an empty cage and a cage containing a congener to the tested mouse and  
217 measured the time spent by the tested mouse to sniff either cage. Both *Dyrk1a<sup>C/C</sup>* and control  
218 mice showed social preference as they spent significantly more time sniffing the cage  
219 containing the congener than the empty cage (Supplementary figure 2G, Social preference).  
220 However, the total amount of time spent with their congener was decreased in *Dyrk1a<sup>C/C</sup>* mice  
221 compared to control mice whereas the time spent exploring the empty cage did not differ (Figure

222 3K). Preference for social novelty was tested by placing a new congener in the empty cage.  
223 Both genotypes spent significantly more time sniffing the cage containing the new congener  
224 compared to the cage with the familiar one (>60% of the time allocated for the new congener)  
225 (Supplementary figure 2H, Social novelty preference). There was also no significant difference  
226 in the total time control and transgenic animals spent sniffing both congeners (Supplementary  
227 figure 2I, Social contact).

228 Finally, as *DYRK1A* haploinsufficiency in human is causing epilepsy, we challenged the  
229 homozygous inactivation in *Dyrk1a<sup>C/C</sup>* and control mice with two different doses of the seizure-  
230 provoking agent pentylenetetrazol (PTZ) and the occurrence of myoclonic, clonic and tonic  
231 seizures was scored. At both 30 mg/kg (Supplementary figure 2J and 50 mg/kg (Supplementary  
232 figure 2K), *Dyrk1a<sup>C/C</sup>* susceptibility to seizure was similar to control mice. Altogether, those  
233 results indicate that *Dyrk1a* full inactivation in glutamatergic neurons does not increase  
234 susceptibility to PTZ-induced seizure.

235 Hence, *Dyrk1a* inactivation in glutamatergic neurons only impacts specific cognitive  
236 function such as explicit long-term memory, contextual fear memory and exploratory behavior  
237 while having no impact in others such as working memory, social behaviour and epileptic  
238 susceptibility.

239

240 ***Dyrk1a* inactivation in the glutamatergic neurons lowers expression of genes involved in**  
241 **neurotransmission in the hippocampus, while enhancing expression of genes implicated in**  
242 **the regulation of transcription.**

243 The hippocampus is a key structure in memory formation. Long-term object recognition  
244 memory analysed in the NOR test was shown to require interaction between the hippocampus  
245 and the perirhinal cortex [23-25] while contextual fear memory involves a neural circuit  
246 including the hippocampus, amygdala and medial prefrontal cortex [26]. Although we could

247 not detect any morphological defect in the hippocampus of *Dyrk1a*<sup>C/C</sup> mice, those mice are  
248 defective in both long-term recognition and contextual fear memories. To unravel the potential  
249 molecular mechanisms underlying the learning defects of *Dyrk1a*<sup>C/C</sup> mice, we performed  
250 genome-wide transcriptional profiling (RNA-seq) of *Dyrk1a*<sup>C/C</sup> and control mice in the  
251 hippocampus at postnatal day 30. Analysis of the RNA-seq exon reads (DEseq algorithm,  
252  $P < 0.025$ ) identified 297 up-regulated and 257 down-regulated genes in *Dyrk1a*<sup>C/C</sup> compared  
253 with controls (Supplementary Table S1.). To determine the putative cell types associated with  
254 the deregulated genes, we compared the sets of up- and down-regulated genes with the markers  
255 of hippocampal cell types obtained from single cell RNA-seq [PMID: 25700174][ PMID:  
256 29273784] (see methods). As a result, up-regulated genes were predominantly enriched in  
257 oligodendrocyte-expressed genes (hypergeometric test, *bonferroni* corrected,  $P < 3.4E-13$ )  
258 whereas down-regulated genes were enriched in neuronal markers (hypergeometric test,  
259 *bonferroni* corrected, pyramidal markers  $P < 2.3E-4$ , interneuronal markers  $P < 8.3E-3$ )  
260 (Supplementary Table S2). This decrease in neuronal markers expression is not reflected by a  
261 decrease in neuronal cells in the hippocampus as we did not observe a decrease in the thickness  
262 of the pyramidal cell layers or the DG granular cell layer, and did not find a deficit in the number  
263 of neurons within the CA1 of the *Dyrk1a*<sup>C/C</sup> hippocampus (Supplementary figure 1). Next, we  
264 performed GO enrichment analyses of the lists of up- and down-regulated genes with using a  
265 *Benjamini* cut-off of  $P < 0.05$  (Table 1). The strongest enrichments for up-regulated genes were  
266 related to transcriptional regulation and DNA methylation. This category of genes did not have  
267 any overlap with the oligodendrocyte overexpressed genes at the exception of the SRY-related  
268 HMG-box transcription factor *Sox8* and we did not find any enriched specific function for the  
269 list of the oligodendrocyte markers that are up-regulated in *Dyrk1a*<sup>C/C</sup> hippocampi. We counted  
270 the number of Olig2+ cells in the corpus-callosum and found no difference between *Dyrk1a*<sup>C/C</sup>  
271 and control mice, suggesting that increased oligodendrocyte markers is not due to an increased

272 number of oligodendrocytes (Supplementary figure 3). Interestingly, among up-regulated  
273 genes, we found *Nr4a1* (*Nurr77*), *Arc* (*Arg3.1*), *Npas4*, *Fos* (*cFos*), *Egr1* (*Zif268*) and *Fosb*,  
274 six immediate-early genes (IEGs) encoding proteins involved in transduction signals that are  
275 induced in response to a wide variety of cellular stimuli and that are implicated in neuronal  
276 plasticity. Looking at known late response genes known to be activated by NPAS4 [27] in  
277 glutamatergic neurons, only three out of thirty-four (10%) of them were significantly  
278 deregulated in the hippocampus of *Dyrk1a*<sup>C/C</sup> compared to control mice (Supplementary Table  
279 S3), with *Fam198b* being up-regulated and *Csrnp1* and *Slc2a1* being down-regulated. Among  
280 target genes of NPAS4 shared between excitatory and inhibitory cells, four out of twelve  
281 (~30%) that we looked at were found deregulated in the hippocampus of *Dyrk1a*<sup>C/C</sup> compared  
282 to control mice (*Lmo2* and *Fosl2*, up-regulated; *Mylk* and *Nptx2*, down-regulated). Down-  
283 regulated genes found in the hippocampus transcriptome of *Dyrk1a*<sup>C/C</sup> mice were associated  
284 with presynaptic vesicle exocytosis, regulation of neurotransmitter levels and neuron  
285 projection, and pointed at a perturbation of chemical synaptic transmission via the deregulation  
286 of proteins involved in synaptic vesicle exocytosis. Particularly, genes coding for proteins of  
287 the SNARE complex (*Snap25*, *Stx1a*, *Napa* and *Napb*), regulating its activity (*Doc2b*, *Snph*) or  
288 implicated in vesicular synaptic cycle (*Anxa7*, *Amph*, *Syn2*, *Syngr1*) were found down-regulated  
289 in the hippocampus of *Dyrk1a*<sup>C/C</sup> mice. This complex is known to mediate synaptic vesicle  
290 docking and fusion with the presynaptic membrane during neuromediator release. The SNARE  
291 complex was recently found, also with NPAS4, as a common pathway misregulated in models  
292 of DS overexpressing DYRK1A (Duchon et al, HMG).

293

294 **Behavioural defects are induced in *Dyrk1a*<sup>C/+</sup> mice while partial rescue of memory**  
295 **alterations is observed in *Dp1Yey/Dyrk1a*<sup>C/+</sup> mice.**

296 We investigated the respective consequences of *Dyrk1a* dosage in glutamatergic neurons on the  
297 cognitive phenotypes observed respectively in MRD7 and DS mouse models. We analysed

298 mice heterozygous for the *Dyrk1a* knockout allele in glutamatergic neurons to investigate the  
299 implication of this gene in the cognitive phenotypes of MRD7. We also performed a rescue  
300 experiment consisting on the return to two copies of *Dyrk1a* in the glutamatergic neurons of  
301 Dp1Yey trisomic mice. For this, we compared animals carrying *Dyrk1a*<sup>Camk2aCre/+</sup> (noted  
302 *Dyrk1a*<sup>C/+</sup>), Dp1Yey, and Dp1Yey/*Dyrk1a*<sup>Camk2aCre/+</sup> (noted Dp1Yey/*Dyrk1a*<sup>C/+</sup>), with  
303 *Dyrk1a*<sup>CKO/+</sup> as controls in behavioural tests. Mouse locomotor behaviour was tested in the  
304 open-field (OF). *Dyrk1a*<sup>C/+</sup> mice did not show any significant difference in locomotor activity  
305 compared to controls. Surprisingly, whereas in our conditions Dp1Yey mice travelled the same  
306 total distance in the OF as control mice, Dp1Yey/*Dyrk1a*<sup>C/+</sup> mice travelled significantly more  
307 distance (Figure 4A), suggesting that those mice are hyperactive. The percentage of time spent  
308 by the mice in the centre of the open field arena did not differ between genotypes (Figure 4B),  
309 suggesting normal anxiety-related behaviour. Mice heterozygous for *Dyrk1a* in glutamatergic  
310 neurons presented the same behaviour as control mice, indicating that removing only one copy  
311 of *Dyrk1a* is not enough to trigger decreased anxiety, as observed in the complete knockout of  
312 *Dyrk1a* in glutamatergic neurons (Figure 4B vs Figure 3A). Analysis of working memory was  
313 done using the Y maze test. All the four groups of mice visited the same number of arms during  
314 the test, suggesting a normal locomotor activity (Supplementary figure 4A). On the other hand,  
315 Dp1Yey mice showed lower percentage of spontaneous alternation as compared to control mice  
316 (Figure 4C), confirming the phenotype already observed in previous studies [28] (Duchon and  
317 Herault, HMG). This decreased performance was not restored by *Dyrk1a* normalization in  
318 glutamatergic neurons (Figure 4C). Haploinsufficiency of *Dyrk1a* in those neurons, like the  
319 inactivation of the two copies of *Dyrk1a*, did not trigger any change in working memory (Figure  
320 4C). We therefore also tested *Dyrk1a*<sup>+/-</sup> mice in the same test. *Dyrk1a*<sup>+/-</sup> animals showed the  
321 same activity (number of visited arms, Supplementary figure 4B) and the same level of

322 alternation as their wild-type littermates, indicating a normal working memory (Supplementary  
323 figure 4C).

324 We further tested the mice in the NOR test for long term reference memory. Both control and  
325 Dp1Yey/*Dyrk1a*<sup>C/+</sup> mice showed a significant preferential exploration of the novel object  
326 during the retention trial (Figure 4E) whereas Dp1Yey and *Dyrk1a*<sup>C/+</sup> mice spent the same time  
327 on the two objects (Figure 4E). The deficit of novel object exploration during the retention  
328 phase in Dp1Yey and *Dyrk1a*<sup>C/+</sup> mice was not due to a lack of familiar object exploration during  
329 the presentation phase as both genotypes showed similar exploration times than control mice  
330 (Figure 4D). Only Dp1Yey/*Dyrk1a*<sup>C/+</sup> showed a slight decrease in object exploration compared  
331 to control mice during the presentation phase mice (Figure 4D), but this did not impair their  
332 retention capacity during the test phase. Hence, the deficit in object recognition in Dp1Yey  
333 mice could be rescued by normalization of *Dyrk1a* copy number in glutamatergic neurons and  
334 is also generated by the absence of one copy of the gene in the same neuronal cell line. In the  
335 fear conditioning test, all genotypes showed more freezing during the context phase after  
336 conditioning than during the habituation phase and no difference was observed between  
337 genotypes in the context response (Supplementary figure 4D). In the sociability 3-chambers  
338 test, all the four groups of mice showed preference for the cage containing the mouse rather  
339 than the empty cage (Supplementary figure 4E). No difference was found between the four  
340 groups in the total amount of time spent sniffing the cage containing the congener  
341 (Supplementary figure 4F). Hence, by contrast to *Dyrk1a*<sup>C/C</sup> mice, *Dyrk1a*<sup>C/+</sup> mice do not  
342 present decreased social exploratory behaviour. Dp1Yey mice did not spend significantly more  
343 time with the novel mouse compared to the familiar one, indicating no preference for social  
344 novelty (Figure 4F). This phenotype was rescued by returning to two copies of *Dyrk1a* in  
345 glutamatergic neurons (Figure 4F). *Dyrk1a*<sup>C/+</sup> mice also showed preference for social novelty  
346 (Figure 4F).

347 Hence, both increase in *Dyrk1a* copy number in glutamatergic neurons of trisomic mice  
348 and haploinsufficiency of *Dyrk1a* in glutamatergic neurons impact explicit memory supporting  
349 a key role of *Dyrk1a* in glutamatergic function as a modulator of explicit memory, but other  
350 functions probably require normalization of *Dyrk1a* in other cell types to be restored.

351

### 352 **Proteomic analysis confirms the impact of *Dyrk1a* gene dosage on synaptic activity.**

353 To examine the contribution of DYRK1A in molecular pathways linked to the cognitive  
354 phenotypes associated to T21 in the glutamatergic neurons, we performed proteomic profiling  
355 of the hippocampus of control, Dp1Yey, Dp1Yey/*Dyrk1a*<sup>C/+</sup> and *Dyrk1a*<sup>C/+</sup> mice. We identified  
356 63 proteins that were up-regulated and 16 that were down-regulated in the hippocampi of  
357 Dp1Yey mice compared with controls. Among those, 40 of the up-regulated and 12 of the  
358 down-regulated proteins were back to control levels in Dp1Yey/*Dyrk1a*<sup>C/+</sup> hippocampi, while  
359 one up-regulated protein in Dp1Yey was down-regulated in Dp1Yey/*Dyrk1a*<sup>C/+</sup> and 4 down-  
360 regulated proteins in Dp1Yey were up-regulated in Dp1Yey/*Dyrk1a*<sup>C/+</sup> mice. We found 51 up-  
361 regulated and 7 down-regulated proteins in the hippocampus of *Dyrk1a*<sup>C/+</sup> mice. Eleven of those  
362 proteins (CAMK2A, ATP6V1C1, DPP3, ERGIC1, GPM6A, CENPV, RPS28, AGAP2, SNX6,  
363 ABCA1, BRK1) were also deregulated in Dp1Yey and back to normal level in  
364 Dp1Yey/*Dyrk1a*<sup>C/+</sup>, suggesting that they are impacted by *Dyrk1a* copy number in glutamatergic  
365 neurons (Figure 5A and Supplementary Table S4). We performed GO enrichment analysis on  
366 the list of deregulated proteins using the ToppCluster website, selecting a Bonferroni cut-off of  
367 P<0.05. Enrichment analysis indicates that pathways and GO components that are mostly  
368 affected by *Dyrk1a* gene dosage are synaptic, dendritic and axonal components (Figure 5B-C;  
369 Supplementary Table S5). Normalization of *Dyrk1a* copy number in the glutamatergic neurons  
370 did not rescue specific pathways but had a more global effect with 50 to 80% of the proteins  
371 present in each Dp1Yey enriched GO returning to normal amount in Dp1Yey/*Dyrk1a*<sup>C/+</sup> mice



372 (Figure 5B). Interestingly, decreased *Dyrk1a* gene dosage was found to impact pre-synaptic  
373 proteins as observed in the transcriptome of *Dyrk1a<sup>C/C</sup>* hippocampi, whereas increased *Dyrk1a*  
374 gene dosage was associated with the post-synapse and growth cone (Figure 5C). Proteins  
375 enriched in the hippocampus of *Dyrk1a<sup>C/+</sup>* mice were linked to translational activity whereas  
376 increased *Dyrk1a* gene dosage was associated to ATPase activity (Figure 5C).

377

### 378 **Interaction of DYRK1A with post-synaptic proteins**

379 Behavioural and proteomic analyses suggest a direct impact of DYRK1A at the  
380 glutamatergic synapse. Previous work from our laboratory already demonstrated a role of  
381 DYRK1A at the presynapse by showing interaction of DYRK1A with SYN1, a neuronal  
382 phosphoprotein associating with the cytoplasmic surface of the presynaptic vesicles and  
383 tethering them to the actin cytoskeleton [29, 30], and with CAMK2 that was previously shown  
384 to phosphorylate SYN1 leading to the release of the vesicle pool [31-33]. Moreover, we also  
385 found that SYN1 was phosphorylated by DYRK1A on its S551 residue *in vitro* and *in vivo*,  
386 highlighting the role of DYRK1A in SYN1-dependent presynaptic vesicle trafficking [33].  
387 CAMK2, deregulated in our proteomic analysis, is also present in the glutamatergic postsynapse  
388 and has a major role in the molecular cascade leading to LTP [34]. To investigate a potential  
389 role of DYRK1A at the postsynapse, we looked at DYRK1A protein interaction with CAMK2  
390 and key proteins of the postsynaptic density complex (PSD), GLUN2B (NR2B), PSD95 and  
391 SYNGAP. We carried co-immunoprecipitation (co-IP) experiments with adult mouse brain  
392 lysates using antibodies against DYRK1A and these proteins and using GAPDH as a negative  
393 control. We found CAMK2A, NR2B and PSD95 present in the immunoprecipitates (IPs) of  
394 DYRK1A, while DYRK1A was found in the IPs of NR2B, PSD95 and SYNGAP (Figure 5D),  
395 showing that these proteins interact together.

396



## 397 **Discussion**

398 Complete *Dyrk1a* inactivation leads to early embryonic lethality with homozygous null  
399 *Dyrk1a* mice presenting drastic developmental growth delay with smaller brain vesicles,  
400 hindering the investigation of *Dyrk1a* function in the brain [19]. We therefore used a conditional  
401 knockout strategy to analyse *Dyrk1a* function in glutamatergic neurons. We found a significant  
402 reduction of about 10% of brain weight and size of *Dyrk1a<sup>C/C</sup>* mice compared to control  
403 animals. In comparison with *Dyrk1a<sup>+/-</sup>* mice that have 30% brain reduction [35] and consistent  
404 with postnatal expression of *Camk2a*, this suggest that microcephaly observed in MRD7 results  
405 from different impacts of DYRK1A on brain neurogenesis during embryonic and postnatal  
406 development, with *Dyrk1a<sup>C/C</sup>* brain revealing the impact of DYRK1A on postnatal neuronal  
407 morphogenesis. Indeed, the cortical size reduction that we observed was associated with  
408 increased cell density, as observed by Guedj and collaborators in *Dyrk1a<sup>+/-</sup>* mice [35] and  
409 suggesting a reduction of neuronal processes as observed in the neocortex of *Dyrk1a<sup>+/-</sup>* mice  
410 [12, 36, 37].

411 DYRK1A deficit in glutamatergic neurons resulted in specific impacts on mouse  
412 behaviour, learning and memory. *Dyrk1a<sup>C/C</sup>* mice were less anxious, spending more time in the  
413 centre of the OF and in the open arms of the EPM, and showed decreased freezing performance  
414 in the fear-related contextual test indicating an impact on emotional behaviour. Deficit in  
415 contextual fear behaviour might be attributed to a defective hippocampal-to-basolateral  
416 amygdala transmission as a result of either a deficit in glutamatergic projections or deficit in  
417 excitatory activity [38]. Change in emotional behaviour in *Dyrk1a<sup>C/C</sup>* mice is not the result of  
418 an intrinsic hyperactivity, as the mice did not present increased locomotor activity either  
419 spontaneous (circadian activity) or novelty induced (OF). Hence, contrary to the hypoactivity  
420 induced by full *Dyrk1a* haploinsufficiency [39], absence of DYRK1A in glutamatergic neurons  
421 does not impact mouse locomotor activity. Thermal pain sensitivity was altered in *Dyrk1a<sup>C/C</sup>*

422 mice that were more sensitive to heat. This higher nociception response was also observed in  
423 *Dyrk1a*<sup>+/-</sup> mice, suggesting that DYRK1A has an impact on central processes involved in the  
424 control of pain sensitivity. The glutamatergic system takes part in the nociceptive circuits and  
425 activation of the expression of IEGs, whose expression was found increased in *Dyrk1a*<sup>C/C</sup> mice,  
426 has been shown to be part of long-term events triggered in neuroadaptation to pain in those  
427 circuits [40]. Interestingly, we and our collaborators observed a decreased in the expression of  
428 some of these IEGs (*Npas4*, *Arc*, *c-Fos* and *Fosb*) in the hippocampi of Tg(*Dyrk1a*) and of the  
429 trisomic mouse models Dp1Rhr and Ts65Dn [41] (Duchon et al). IEGs are also believed to be  
430 crucial in the formation of long-term memory which we also found impacted in *Dyrk1a*<sup>C/C</sup> and  
431 trisomic mice [42]. Moreover, our meta-analysis of the transcriptomic data of hippocampi from  
432 five DS mouse models carrying Mmu16 segmental duplications and a transgenic model  
433 overexpressing *Dyrk1a* revealed regulatory protein networks centred around six protein hubs,  
434 among which were DYRK1A itself and NPAS4 (Duchon et al.) *Npas4* is a neuron-specific gene  
435 and is present in both excitatory and inhibitory neurons, activating distinct programs of late-  
436 response genes promoting inhibition onto excitatory neurons and excitation on inhibitory  
437 neurons [27]. But we did not found major changes in the expression of late response genes  
438 targeted by NPAS4 (Supplementary Table S3) [27]. This could be due to experimental bias as  
439 the transcriptomic analysis was done using RNA extracts from whole hippocampi containing  
440 different cell populations. This heterogeneity can hinder glutamatergic-specific expression of  
441 the late-response genes. Even though IEGs are well known markers to measure neuronal  
442 activity during cognitive stimulation, their impact in cognitive processes affected in cognitive  
443 deficit disorders are unknown and we have no explanation for IEGs overexpression in the  
444 hippocampus of *Dyrk1a*<sup>C/C</sup> animals. In our analysis, IEG expression changes have been  
445 observed in “naïve” mice that were not subjected to any exercise or behavioural test. It would  
446 be therefore also interesting to analyse the expression of IEGs and late-response genes in the

447 mice after induction of neuronal activity, as it was explored for activation of Arc mRNA  
448 transcription in pyramidal neurons of the CA1 region of the hippocampus in Ts65Dn mice [43].  
449 In addition to transcriptional up-regulation, we also observed a down-regulation of genes for  
450 proteins involved in neuron projection, reinforcing the conclusion of a defective synaptogenesis  
451 in *Dyrk1a<sup>C/C</sup>* animals, and proteins involved in synaptic vesicle cycle, implicating DYRK1A in  
452 neurotransmitter release. Among the deregulated genes, we found *Amphiphysin (Amph)*, which  
453 its protein is a known target of DYRK1A [44], and *Synapsin 2 (Syn2)*, which paralog  
454 SYNAPSIN 1 was found to be hyperphosphorylated by DYRK1A overexpression in TgDyrk1a  
455 mice [33]. Moreover, DYRK1A was found to phosphorylate MUNC18-1 [45], which interacts  
456 with the SNARE complex protein Syntaxin 1A, whose transcripts are also decreased in the  
457 hippocampus of *Dyrk1a<sup>C/C</sup>* mice and which was found to be one of the six hubs connecting the  
458 major subnetwork biological cascades found deregulated in DS models (Duchon et al.). Our results  
459 together with others [44, 46, 47] point at a role of DYRK1A in the glutamatergic presynapse in  
460 the control of neurotransmitter release through synaptic vesicles exocytosis and vesicles  
461 recycling processes.

462 We assessed the impact of *Dyrk1a* deficit in the glutamatergic neurons in *Dyrk1a<sup>C/+</sup>* as  
463 a model of MRD7. While *Dyrk1a<sup>C/C</sup>* mice were less anxious, this phenotype was not observed  
464 in *Dyrk1a<sup>C/+</sup>* mice, indicating that haploinsufficiency of *Dyrk1a* is not sufficient to trigger this  
465 decreased anxiety pattern. Working memory was not affected neither in *Dyrk1a<sup>C/+</sup>* nor  
466 *Dyrk1a<sup>C/C</sup>* mice. This fits with our observation that working memory is also not affected in  
467 *Dyrk1a<sup>+/-</sup>* mice. We found that long-term recognition memory is affected in both *Dyrk1a<sup>C/+</sup>* and  
468 *Dyrk1a<sup>C/C</sup>* mice. Deficit in long-term NOR has also been described in *Dyrk1a<sup>+/-</sup>* mice [12] and  
469 in transgenic model overexpressing *Dyrk1a* alone [33] (DUCHON). Together with the rescue  
470 of this type of memory in Dp1Yey, our findings show that DYRK1A has a direct cell-  
471 autonomous function in regulating long-term explicit memory in glutamatergic neurons.

472 Cognitive deficits observed in DS have been linked to a perturbation of synaptic  
473 transmission due to defects in the control of the excitatory/inhibitory balance. In addition, most  
474 of the phenotypes observed in DS people and models are due to defects in the hippocampus or  
475 the prefrontal cortex [48]. Analysis of trisomic mouse models has revealed an overproduction  
476 of the inhibitory neurotransmitter GABA restricting synaptic activation of the glutamatergic  
477 NMDA receptors. Furthermore, *Dyrk1a* has been implicated in glutamate-GABA imbalance  
478 [49, 50]. However, how *Dyrk1a* controls the balance between the two pathways is still not clear.  
479 We performed a genetic rescue returning to two copies of *Dyrk1a* exclusively in cortical and  
480 hippocampal glutamatergic neurons of Dp1Yey mice and carried behavioural analysis of those  
481 mice to see if this rescue was enough to restore cognitive functions in Dp1Yey mice. We already  
482 found that Dp1Yey mice have deficits in both hippocampus-dependent spatial working and  
483 long-term explicit memory (Duchon et al.). In addition, Yu and collaborators showed deficits  
484 in hippocampal-mediated context memory [51]. We confirmed the deficit in in long-term  
485 explicit memory and in working memory. However, we did not observe a deficit in contextual  
486 memory in those mice. Normalization of gene copy number in glutamatergic neurons only  
487 partly restored the cognitive functions that were impacted in the Dp1Yey mice. Working  
488 memory deficit was not restored in Dp1Yey/*Dyrk1a*<sup>C/+</sup> mice. As *Dyrk1a* haploinsufficiency  
489 does not impact working memory, this could question the role of *Dyrk1a* in the deficit observed  
490 in Dp1Yey mice. Nevertheless, the overexpression of *Dyrk1a* alone was able to induce a deficit  
491 in spontaneous alternation [33] (DUCHON). Deletion of *Dyrk1a* under Camk2a-Cre occurs  
492 after birth and hence the lack of rescue of working memory in Dp1Yey/*Dyrk1a*<sup>C/+</sup> mice could  
493 result from prenatal brain defects. However, it was shown that spontaneous alternation in  
494 rodents is not present during the early postnatal stages of development (before postnatal day  
495 30), indicating that brain processes sustaining this behaviour develops between the second and  
496 fourth postnatal week [52]. Furthermore, treatment of adult mice with an inhibitor of DYRK1A

497 is sufficient to restore working memory in Ts65Dn mice [50]. This lack of rescue presumably  
498 comes from the effect of *Dyrk1a* overexpression in non-glutamatergic neurons. The role of the  
499 GABAergic system on spontaneous alternation is not determined but the injection of a GABA<sub>A</sub>  
500 receptor agonist has been shown to decrease spontaneous alternation rates [53, 54].  
501 Furthermore, DYRK1A was shown to act on GABA-producing enzymes [49]. Testing this  
502 hypothesis will require to normalize *Dyrk1a* in GABAergic neurons.

503 DS patients are affected in their explicit long-term memory abilities with a particular  
504 impairment in the visuo-perceptual processing [55]. We used the visual-object recognition  
505 NOR test as a paradigm to assess long-term explicit memory in the mouse. Both TgDyrk1a and  
506 Ts65Dn mouse models have been shown to have impaired long-term object recognition  
507 memory that could be ameliorated by treating the adult mice with the DYRK1A inhibitors [56-  
508 58]. We show here that correcting *Dyrk1a* gene copy number in glutamatergic neurons is  
509 sufficient to rescue explicit long-term memory in Dp1Yey/*Dyrk1a*<sup>C/+</sup> mice. Moreover,  
510 DYRK1A shortage in glutamatergic neurons is also sufficient to trigger long-term memory  
511 deficit. Hence *Dyrk1a* gene dosage seems to have an important role in glutamatergic neuronal  
512 defects observed in DS and MRD7 mouse models. TgDyrk1a mice have been shown to have  
513 bidirectional changes in synaptic strength with elevated LTP, reduced LTD [10] and  
514 dysregulated NMDA-receptor mediated calcium signalling [59]. Furthermore, normalization of  
515 *Dyrk1a* expression in the hippocampus of Ts65Dn mice can partially restore the deficit of LTP  
516 in the CA1 of Ts65Dn mice. As Dp1Yey mice show similar hippocampal LTP deficit [51], it  
517 would be interesting to see if *Dyrk1a* normalisation in the glutamatergic neurons could restore  
518 LTP in Dp1Yey/*Dyrk1a*<sup>C/+</sup> mice.

519 Excessive GABAergic inhibition has been proposed as the major cause of the  
520 perturbation between excitatory and inhibitory neurotransmission, with glutamatergic deficit  
521 being the consequence of over-inhibition of the NMDA receptors resulting in deficit of LTP

522 and memory [60]. Our finding outlines the glutamatergic deficit as a distinct alteration with  
523 *Dyrk1a* overexpression playing a key role in glutamatergic dysfunction and GABA-mediated  
524 over-inhibition combining with it to produce the full DS cognitive deficit. This also raises the  
525 question of the role of *Dyrk1a* overexpression in GABAergic neurons as other trisomic genes  
526 are also potential candidates for neuronal dysfunction. For example, overexpression of *Girk2*  
527 leads to increase in GABA<sub>A</sub>-mediated GIRK currents in hippocampal neuronal cultures,  
528 affecting the balance between excitatory and inhibitory transmission [61, 62].

529         The finding of a cell-autonomous impact of DYRK1A in glutamatergic neurons on long-  
530 term memory function is supported by the impact of increased *Dyrk1a* gene dosage in  
531 glutamatergic neurons on the amount of glutamatergic post-synaptic proteins. Hence, among  
532 enriched proteins in the hippocampus of Dp1Yey mice that turned back to normal in the  
533 hippocampus of Dp1Yey/*Dyrk1a*<sup>C/+</sup> mice, we found CAMK2A, a subunit of the  
534 calcium/calmodulin-dependent protein kinase II (CAMK2) which plays a critical role in LTP  
535 by regulating ionotropic glutamate receptors at postsynaptic densities, GPM6A, a neuronal  
536 membrane glycoprotein involved in neuronal plasticity, regulation of endocytosis and  
537 intracellular trafficking of G-protein-coupled receptors [63], the GRM3 G-protein-coupled  
538 metabotropic glutamate receptor, DLG2, a member of the postsynaptic protein scaffold of  
539 excitatory synapses interacting with the cytoplasmic tail of NMDA receptors [64] and the  
540 intracellular calcium-binding protein CALB2 functioning as a modulator of neuronal  
541 excitability [65]. Previous work done in our laboratory found several proteins from the PSD  
542 that were hyperphosphorylated in mice with three copies of *Dyrk1a* (TgDyrk1a) [35] and  
543 dephosphorylated by TgDyrk1a mouse treatment with a DYRK1A inhibitor [33]. Among those  
544 proteins, the NR2B is a subunit of the glutamatergic postsynaptic NMDA receptor which play  
545 a pivotal role in excitatory synaptic transmission. This result was validated by our Co-IP  
546 experiments showing an interaction between DYRK1A and NR2B. NR2B subunits are

547 expressed in the neocortex and hippocampus [66-68]. NMDA receptors in the mature  
548 hippocampus consist of two NR1 subunits associated with either two NR2A, two NR2B or one  
549 of each subunits [69, 70] and different forms of synaptic plasticity have been associated to  
550 different types of NMDA receptors [71-73]. Hence, in addition to its interaction with the  
551 NR1/NR2A-type of receptors [74], we also point out an association with NR1/NR2B receptors.  
552 Moreover, interaction between DYRK1A and the PSD proteins PSD95, CAMK2 and  
553 SYNGAP, detected by coIP, strongly suggests a role of DYRK1A at the glutamatergic  
554 postsynapse. In addition, absence of the GLUR1 subunit of the AMPA receptor in the IP of  
555 DYRK1A indicates that DYRK1A interact most specifically with the NMDA-PSD complex.  
556 Altogether, this strongly suggests an implication of DYRK1A at the glutamatergic post-  
557 synapse, somehow supporting its involvement in long-term memory formation.

558 Taking advantage of a conditional allele for *Dyrk1a* inactivation, we were able to  
559 associate *Dyrk1a* gene dosage changes in glutamatergic neurons to specific cognitive  
560 phenotypes and molecular modifications and demonstrated a major impact of *Dyrk1a* dose  
561 change at the glutamatergic synapse on long-term explicit memory while no impact was  
562 observed for motor activity, short-term working memory and susceptibility to epilepsy. Further  
563 analysis of DYRK1A impact on other neurons, such as GABAergic ones, will be necessary to  
564 understand how DYRK1A perturbs the excitatory/inhibitory pathways, resulting in the full DS  
565 and MRD7 cognitive deficits.

566

567

568

569

570



## 571 **Materials and Methods**

### 572 **Mouse lines**

573           The Dp(16Lipi-Zbtb21)1Yey (Dp1Yey) line was created by Yu and collaborators [75]  
574 and bears a 22.6 Mb segmental duplication of the *Lipi-Zfp295* fragment of murine chromosome  
575 16 syntenic to Hsa21 [51, 75]. The transgenic Tg(Camk2-Cre)4Gsc line [20, 76] expressing the  
576 Cre recombinase under the control of the Camk2a promoter to inactivate the targeted  
577 conditional knockout allele in glutamatergic neurons of the cortex and hippocampus after birth.  
578 The *Dyrk1*<sup>tm1.1CS</sup> conditional knockout (noted *Dyrk1a* cKO) was generated at the PHENOMIN-  
579 ICS (Institut Clinique de la Souris; Illkirch, France; [www.phenomin.fr](http://www.phenomin.fr)) in the frame of the  
580 Gencodys consortium (<http://www.gencodys.eu/>). The targeting vector was constructed as  
581 follows. A 1096 bps fragment encompassing exon 7 (ENSMUSE00001246185) was amplified  
582 by PCR (from BAC RP23-115D20 genomic DNA) and subcloned in an MCI proprietary vector.  
583 This MCI vector contains a LoxP site as well as a floxed and flipped Neomycin resistance  
584 cassette. A 3.8 kb fragment corresponding to the 3' homology arm and 4.1 kb fragment  
585 corresponding to the 5' homology arms were amplified by PCR and subcloned in step1 plasmid  
586 to generate the final targeting construct. The linearized construct was electroporated in  
587 C57BL/6N (B6N) mouse embryonic stem (ES) cells. After selection, targeted clones were  
588 identified by PCR using external primers and further confirmed by Southern blot with a Neo  
589 probe (5' and 3' digests) as well as a 5' external probe. Two positive ES clones were injected  
590 into BALB/cN blastocysts. Resulting male chimeras were bred with Flp deleter females  
591 previously backcrossed in a C57BL/6N [77] (PMID: 10835623). Germline transmission of the  
592 conditional allele was obtained (Figure 1B). The Flp transgene was segregated by a further  
593 breeding step. By combining the three different lines together, we obtained the following groups  
594 of mice for phenotyping analyses: Dp1Yey (trisomic, for the *Lipi-Zfp295* fragment containing  
595 the *Dyrk1a* gene), Dp1Yey/*Dyrk1a*<sup>C/+</sup> (trisomic for the *Lipi-Zfp295* fragment but containing



596 only two copies of *Dyrk1a* in glutamatergic neurons), *Dyrk1a*<sup>C/+</sup> (containing only one copy of  
597 *Dyrk1a* in the glutamatergic neurons) and *Dyrk1a*<sup>C/C</sup> (knocked out for *Dyrk1a* in glutamatergic  
598 neurons). Wild-type, *Dyrk1a*<sup>cKO/+</sup> and *Dyrk1a*<sup>cKO/cKO</sup> mice were used as disomic controls.

599 For the genotyping of the mice and identification of the *Dyrk1a* knockout allele in the  
600 brain, genomic DNA was isolated from tail and different organ biopsies using the NaCl  
601 precipitation technique. 50-100 ng of genomic DNA was used for PCR. Primers used for the  
602 identification of each allele and size of PCR products are described in Figure 1 and  
603 Supplementary Table S6. Details on the genotyping protocol used here are published [78].

604 The mice were housed in groups (2–4 per cage) and were maintained under specific  
605 pathogen-free (SPF) conditions and were treated in compliance with the animal welfare policies  
606 of the French Ministry of Agriculture 133 (law 87 848).

607

#### 608 **Mouse RT droplet digital PCR (ddPCR)**

609 Total RNA was extracted from frozen brain tissues (cerebellum, cortex, striatum, hippocampus  
610 and thalamus/hypothalamus) of five wt and four *Dyrk1a*<sup>C/C</sup> mice as described in Lindner *et al.*  
611 2020 [79]. For ddPCR, all primers were designed and synthesized as described in Lindner *et al.*  
612 2020 [79] excepting Universal Probe Library probe used to *Dyrk1a* mRNA which is provided  
613 by Roche. *Dyrk1a* and *Hprt* primers and probes sequences are given in Supplementary Table  
614 S6. RNA reverse transcription, droplet generation, PCR amplification, droplets quantification  
615 and analysis are also described in Lindner *et al* 2020 [79]. We presented the results as a ratio  
616 of the mean of *Dyrk1a* RNA transcript in *Dyrk1a*<sup>C/C</sup> tissue normalized to the mean of *Dyrk1a*  
617 RNA transcript in wt tissue. Experiments were performed following dMIQE guidelines for  
618 reporting ddPCR experiments (Supplementary Table S7) [79, 80].

#### 619 **Western blot analysis**

620 Twenty-five microgram of total protein extracts from hippocampi (n=3 per genotype)  
621 were electrophoretically separated in SDS-polyacrylamide gels (10%) and transferred to a  
622 nitrocellulose membrane (100V, 2h at room temperature). Non-specific binding sites were  
623 blocked with 5% skimmed milk in Tween20 0.1% Tris buffer saline 1h at room temperature.  
624 Immunostaining was carried out with a mouse monoclonal anti-Dyrk1a (Abnova, H00001859-  
625 M01) and an anti-Gapdh antibodies (ThermoFisher, MA5-15738), followed by secondary anti-  
626 mouse IgG conjugated with horseradish peroxidase (DAKO). The immunoreactions were  
627 visualized by ECL chemiluminescence system (Amersham) with the Amersham Imager 600.  
628 Semi-quantitative analysis was performed using ImageJ software (W. Rasband, NIH;  
629 <http://rsb.info.nih.gov/ij/>).

630

### 631 **Immunohistological analysis**

632 Adult mice were deeply anesthetized with sodium pentobarbital and perfused  
633 intracardially with 30 ml PBS followed by 30 ml 4% paraformaldehyde in PBS. Brains were  
634 removed from the skull and immersed in the same fixative overnight. After rinsing with PBS,  
635 the brains were transferred into 70% ethanol until paraffin inclusion. For inclusion, brains were  
636 dehydrated and embedded in paraffin. Serial 10 µm sections were made with a microtome.

637 Brain sections were stained using the myelin-specific dye luxol fast blue and the Nissl  
638 staining cresyl violet. Briefly, brain sections were deparaffinised, rehydrated and incubated in  
639 0.1% luxol fast blue (95% alcohol and 0.5% acetic acid) solution at room temperature  
640 overnight. After rinsing excess stain with 95% ethanol and deionized water, the slides were  
641 placed in 0.05% lithium carbonate solution for 10 seconds followed by 70% ethanol for 5  
642 seconds. They were then rinsed in deionized water until the colourless grey matter contrasted  
643 with the blue-green white matter. Sections were then stained in 0.1% cresyl violet acetate  
644 solution for 5 minutes at 56°C in a water bath, rinsed in deionized water and quickly in 100%

645 ethanol. Sections were dried, cleared in histosol® (Shandon) and mounted in Eukitt®  
646 (Labonord).

647 Immunohistology was performed using a standard protocol. After deparaffinization,  
648 rehydration and antigen retrieval (10 mM citric acid, 0.05% Tween 20, pH6.0) for 45 min in a  
649 94°C water bath, sections were incubated in a blocking solution (0.05% Tween20, 5% Horse  
650 serum) for 1 hour at room temperature. Sections were then incubated at 4°C overnight with the  
651 primary antibodies (Mouse anti-Dyrk1a: Abnova, Cat. N. H00001859-M01; Rabbit anti-  
652 Camk2a: Molecular probes, PA5-14315). After washing, sections were incubated with anti-  
653 Mouse and anti-Rabbit Alexa Fluor®546 or 488 secondary antibodies for detection. The  
654 sections were mounted with Mowiol mounting medium (0.1M Tris (pH8.5, 25% glycerol, 10%  
655 w/v Mowiol 4-88 (Citifluor)) containing DAPI (5 µg/ml) and images were acquired using  
656 Hamamatsu Nanozoomer 2.0 (Hamamatsu, Hamamatsu City, Japan) and a Leica Upright  
657 fluorescent microscope (Leica Microsystems, Heidelberg).

658 Immunohistochemistry was performed using a standard protocol. Briefly, antigen  
659 retrieval was performed by heating the slides in Tris/EDTA buffer (10 mM Tris Base, 1 mM  
660 EDTA, 0.05% Tween 20, pH 9.0) for 45 min in a 94°C water bath. Then, the sections were  
661 quenched in 0.3% oxygen peroxide solution for 20 min and blocked with 10% normal horse  
662 serum and 0.1% Triton X-100 in 1× PBS for 1 h at room temperature. The sections were  
663 incubated overnight at 4°C with a rabbit anti-Olig2 antibody (1:500, Santa Cruz sc-48817).  
664 which was detected by incubating the sections with secondary biotinylated antibodies (Life  
665 Technologies™) for 2 h at room temperature and then with an avidin-biotin complex at 37°C  
666 for 30 min. Dark coloration was developed with diaminobenzidine tetrahydrochloride and the  
667 sections were mounted with aqueous mounting medium (Faramount aqueous mounting  
668 medium, Dako®).

669 **Morphometric analysis**

670 Morphometric analysis was performed on three *Dyrk1a*<sup>C/C</sup> and three control mice based  
671 on the standard operating procedures for morphological phenotyping of the mouse brain using  
672 basic histology [81]. Surface and cortical thickness measurements as well as cell counting were  
673 conducted on scanned images using Hamamatsu Nanozoomer 2.0 from luxol fast blue/cresyl  
674 violet-stained sections around Bregma -1.5 mm (Paxinos adult mouse brain atlas, Franklin and  
675 Paxinos, 1997). TIFF files were opened in ImageJ with the following settings: 9 decimal places  
676 (using the panel Analyze/Set Measurements) and “cm” as unit length (using Analyze/Set Scale).  
677 The polygon selection tool was used to measure area and the straight line tool was selected to  
678 measure length. The thickness of the different cortical layers (layer I to layer VI) were estimated  
679 in the somatosensory cortex based on the shape and density of the neurons on these different  
680 layers. Cell count performed in the somatosensory cortex was done within a counting frame of  
681 0.1 cm. Cell count performed in the CA1 was done within a counting frame of 0.04 cm width).  
682 Olig2+-positive cells within the corpus callosum were counted by measuring a distance of 1  
683 mm from the midline of the brain and selecting the corpus callosum area underneath. Cell count  
684 was done manually.

685

### 686 **RNA-seq libraries and analysis**

687 Total RNA was Trizol-extracted from 2 wild-type and 2 *Dyrk1a*<sup>C/C</sup> frozen P30  
688 hippocampi. RNA was treated with DNase (Qiagen) and purified on the RNeasy MinElute  
689 Cleanup Kit (Qiagen). 2 µg of total RNA were treated with the Ribo-Zero rRNA Removal Kit  
690 (Human/Mouse/Rat; Illumina). Depleted RNA was precipitated 1h at -80°C in three volumes  
691 of ethanol plus 1 µg of glycogen. RNA was then washed and resuspended in 36 µl of RNase  
692 free water. RNA fragmentation buffer (NEBNext® Magnesium RNA Fragmentation Module)  
693 was added to the solution and the RNA was fragmented by incubation at 95°C for 3 min. cDNA  
694 first strand synthesis was performed with random hexamer primers and cDNA second strand

695 synthesis was performed with dUTPs, to ensure strand specificity. The RNA-seq library was  
696 synthesized with KAPA Hyper prep kit (Kapa Biosystems, Wilmington, MA, USA): a treatment  
697 with USER enzyme (NEB, M5505L) was added to digest the unspecific strand.

698 The libraries were pooled (4/lane) on an Illumina HiSeq. 2000. Libraries were sequenced (50  
699 cycles, single-end) yielding on average 40 million mapped reads. RNA-Seq libraries were  
700 mapped with GSNAP (version 2015-06-23) against mm9 mouse RefSeq annotations updated  
701 to the 28/7/2015.

702 DESeq 2 (v1.14) was used to perform statistical comparisons. All the enrichment analysis were  
703 made from standard hypergeometric tests with benjamini or bonferroni correction. The markers  
704 of hippocampal cell types were obtained from [ref] and the common background genes were  
705 evaluated prior to the enrichment (hypergeometric test). GO annotations were updated to  
706 25/6/2015.

707

## 708 **Proteomic analysis**

709 Fourty microgram of total protein extracts from hippocampus (4 controls, 5 Dp1Yey, 4  
710 Dp1Yey; *Dyrk1a*<sup>C/+</sup> and 5 *Dyrk1a*<sup>C/+</sup>) were used for the preparation. Samples were precipitated,  
711 reduced, alkylated and digested with LysC and trypsin at 37°C overnight. 10 µg of each sample  
712 were then labeled with TMT isobaric tags, pooled, desalted on a C18 spin-column and dried on  
713 a speed-vacuum before nanoLC-MS/MS analysis. Samples were separated on a C18 Accucore  
714 nano-column (75 µm ID x50 cm, 2.6 µm, 150 Å, Thermo Fisher Scientific) coupled in line with  
715 an Orbitrap ELITE mass spectrometer (Thermo Scientific, San Jose, California). Samples were  
716 analyzed in a Top15 HCD (High Collision Dissociation) mass spectrometry on 8h gradient.  
717 Data were processed by database searching using SequestHT (Thermo Fisher Scientific) with  
718 Proteome Discoverer 1.4 software (Thermo Fisher Scientific) against a mouse Swissprot  
719 database (release 2015-03). Peptides were filtered at 5% false discovery rate (FDR) and one

720 peptide in rank 1. Protein quantitation (ratio of the intensity of the fragmented tag in sample  
721 “x” to the intensity of the fragmented tag in one control (disomic) sample used as the reference)  
722 was performed with reporter ions quantifier node in Proteome Discoverer 1.4 software with  
723 integration tolerance of 20 ppm, and the purity correction factor were applied according to the  
724 manufacturer’s instructions. A scaling factor normalization method was used in order to make  
725 sample ratios comparable. Ratios were normalized by calculating the mean of all the peptide  
726 ratios in one sample, calculating a scaling factor (sf=mean [ratio control ref]/mean [ratio sample  
727 x]) for each sample and multiplying each ratio by the sf. Data were filtered with the following  
728 criteria: minimum number of peptide ratios used to calculate the protein ratio equal to 2 ;  
729 variability of the peptide ratios <20%; ratio of Dp1Yey and *Dyrk1a*<sup>C/+</sup> samples compared to  
730 mean of disomic controls,  $x > 1.2$  or  $x < 0.8$  and ratio of Dp1Yey;*Dyrk1a*<sup>C/+</sup> samples compared to  
731 mean of disomic controls  $0.8 < x < 1.2$  among proteins that were selected as deregulated in  
732 Dp1Yey. GO enrichment was calculated in the ToppCluster website  
733 (<https://toppcluster.cchmc.org/>), looking at enrichment within the following features:  
734 Molecular functions, Biological processes, Cellular components, Phenotypes and Pathways,  
735 and using a Bonferroni correction cut-off of  $P < 0.05$ . The results of the enrichments can be found  
736 in the Supplementary Table, Excel File S5.

737

### 738 **Co-immunoprecipitation**

739 Immunoprecipitations were performed on fresh half brains of 3-month old wild-type male mice.  
740 Brains were dissected and lysed in 1.2 ml RIPA lysis buffer (Santa-Cruz Biotechnology,  
741 France) using Precellys® homogenizer tubes. After centrifugation at 2800 g for 2×15 s, 1 ml  
742 brain extract was incubated with 2 µg of antibody of interest at 4°C for 1 h under gentle rotation.  
743 An aliquot of the remaining supernatant was kept for further immunoblotting as homogenate  
744 control. Then, 20 µl protein G agarose beads, previously washed three times with bead buffer,

745 were added to the mix and gently rotated at 4°C for 30 min. After a 1 min spin at 10,000 g and  
746 removal of the supernatant, the pelleted immune complexes were washed three times with bead  
747 buffer before WB analysis with appropriate antibodies directed against DYRK1A (H00001859  
748 M01, Interchim; 1:1000), NMDAR2B (Abcam, #ab65783), PSD95 (ab18258, Abcam, France;  
749 1:1000), CAMK2A (PA5-14315, Thermo Fisher Scientific; 1:1000), SYNGAP (sc-8572, Santa  
750 Cruz biotechnologies; 1:5000) and GAPDH (MA5-15738, Thermo Fisher Scientific; 1:3000).  
751 Immunoblots were revealed with Clarity Western ECL Substrate (Bio-Rad).

752

### 753 **Mouse behavioural analysis**

754 A series of behavioural experiments were conducted in mice with a range of age starting at 2,5  
755 up to 7 months, as described in the Supplementary information. For all these tests, mice were  
756 kept in ventilated cages with free access to food and water. The light cycle was controlled as  
757 12 h light and 12 h dark (lights on at 7:00 AM) and the tests were conducted between 8:00 AM  
758 and 4:00 PM. Due to the difficulty to obtain Dp1Yey; *Dyrk1a*<sup>KO/+</sup> mice (triple crossing and  
759 subfertility of the Dp1Yey line), both males and females were pooled for the analysis. Animals  
760 were transferred to the experimental room 30 min before each experimental test. Behavioural  
761 experimenters were blinded as to the genetic status of the animals. Behavioural experiments  
762 were performed in agreement with the EC directive 2010/63/UE86/609/CEE and was approved  
763 by the local animal care, use and ethic committee of the IGBMC (Com'Eth, no.17, APAFIS  
764 2012-069). The PTZ-induced seizures protocol received the accreditation number  
765 APAFIS#6321. All the standard operating procedures for behavioural phenotyping have been  
766 already described [82-84] and are detailed in the supplementary information.

767

### 768 **Statistical analysis**

769 Statistical analyses were performed using SigmaPlot software. For histological assessments and  
770 behavioral tests comparing *Dyrk1a*<sup>Camk2aCre/Camk2aCre</sup> animals to controls, statistical analyses  
771 were performed using unpaired t-test when appropriate or the non-parametric Mann-Whitney  
772 rank sum test unless otherwise stated in the text. For the four groups analyses (Dp1Yey,  
773 Dp1Yey, Dp1Yey; *Dyrk1a*<sup>C/+</sup>, Dp1Yey, *Dyrk1a*<sup>C/+</sup> and controls) a two-way ANOVA did not  
774 reveal a significant effect of sex and no interaction with the genotype. Therefore, the sex factor  
775 was dropped from the model and a one-way ANOVA and *post hoc* Tukey's multiple  
776 comparison test were used to analyse differences between the four genotype groups.



## 777 **Acknowledgments**

778 We would like to thank members of the research group, of the IGBMC laboratory and of the  
779 ICS. We are grateful to the IGBMC proteomic platform and Doulaye Dembele for their expert  
780 technical assistance in proteomic analysis, and Binnaz Yalcin and Stephan Collins for their help  
781 in brain morphometric analysis. We extend our thanks to the animal care-takers of the ICS who  
782 oversee the mice wellness.

783

784 This work has been supported by the National Centre for Scientific Research (CNRS), the  
785 French National Institute of Health and Medical Research (INSERM), the University of  
786 Strasbourg (Unistra), the French state funds through the “Agence Nationale de la Recherche”  
787 under the frame programme Investissements d’Avenir [ANR-10-IDEX-0002-02, ANR-10-  
788 LABX-0030-INRT, ANR-10-INBS-07 PHENOMIN to YH]. This project has received funding  
789 from the Jérôme Lejeune foundation and the European Union’s Horizon 2020 research and  
790 innovation programme under grant agreement No 848077. The funders had no role in study  
791 design, data collection and analysis, decision to publish, or preparation of the manuscript.

792  
793

794 **Conflict of Interest:** SDG is Founder, President and CEO of Proteas Bioanalytics Inc.,  
795 BioLabs at the Lundquist Institute, 1124 West Carson Street, Torrance, CA 90502, USA.

796

797

798 **TABLE**

**Up-regulated genes**

| <b>GO TERM</b> | <b>BENJ. PVAL</b> | <b>COUNTS</b> | <b>ENRICHMENT</b> | <b>EXPECTED</b> | <b>DESCRIPTION</b>                              |
|----------------|-------------------|---------------|-------------------|-----------------|-------------------------------------------------|
| GO:0006351     | 7.31e-05          | 54/1882       | 21.68             | 2.40            | Transcription, DNA-template                     |
| GO:0006357     | 5.04e-05          | 51/1805       | 20.79             | 2.45            | Regulation of transcription from RNA polymerase |
| GO:0044212     | 9.82e-05          | 32/847        | 9.76              | 3.28            | Transcription regulatory region DNA binding     |
| GO:0006325     | 3.12e-03          | 26/614        | 7.07              | 3.68            | Chromatin organization                          |
| GO:0009653     | 1.65e-03          | 52/2069       | 23.86             | 2.18            | Anatomical structure morphogenesis              |

**Down-regulated genes**

| <b>GO TERM</b> | <b>BENJ. PVAL</b> | <b>COUNTS</b> | <b>ENRICHMENT</b> | <b>EXPECTED</b> | <b>DESCRIPTION</b>                          |
|----------------|-------------------|---------------|-------------------|-----------------|---------------------------------------------|
| GO:0045202     | 3.09e-08          | 36/905        | 8.99              | 4.01            | Synapse                                     |
| GO:0043005     | 1.10e-05          | 39/1285       | 12.76             | 3.06            | Neuron projection                           |
| GO:0098793     | 4.23e-04          | 18/354        | 3.51              | 5.12            | Presynapse                                  |
| GO:0070382     | 1.02e-03          | 13/185        | 1.84              | 7.08            | Exocytic vesicle                            |
| GO:0008021     | 2.64e-03          | 12/167        | 1.66              | 7.24            | Synaptic vesicle                            |
| GO:0070044     | 1.04e-03          | 4/5           | 0.05              | 80.58           | Synaptobrevin 2-SNAP-25-syntaxin-1a complex |
| GO:0031201     | 1.96e-01          | 6/49          | 0.49              | 12.33           | SNARE complex                               |
| GO:0001505     | 1.13e-02          | 12/191        | 1.90              | 6.33            | Regulation of neurotransmitter levels       |
| GO:0061025     | 6.36e-02          | 10/151        | 1.50              | 6.67            | Membrane fusion                             |
| GO:0051648     | 6.78e-02          | 11/188        | 1.87              | 5.89            | Vesicle localisation                        |

799

800 **Table 1: GO enrichment analyses of the up- and down-regulated genes expressed in the**

801 ***Dyrk1a*<sup>C/C</sup> hippocampus (Benjamini cut-off of P < 0.05).**

802

803 **Figure Legends**

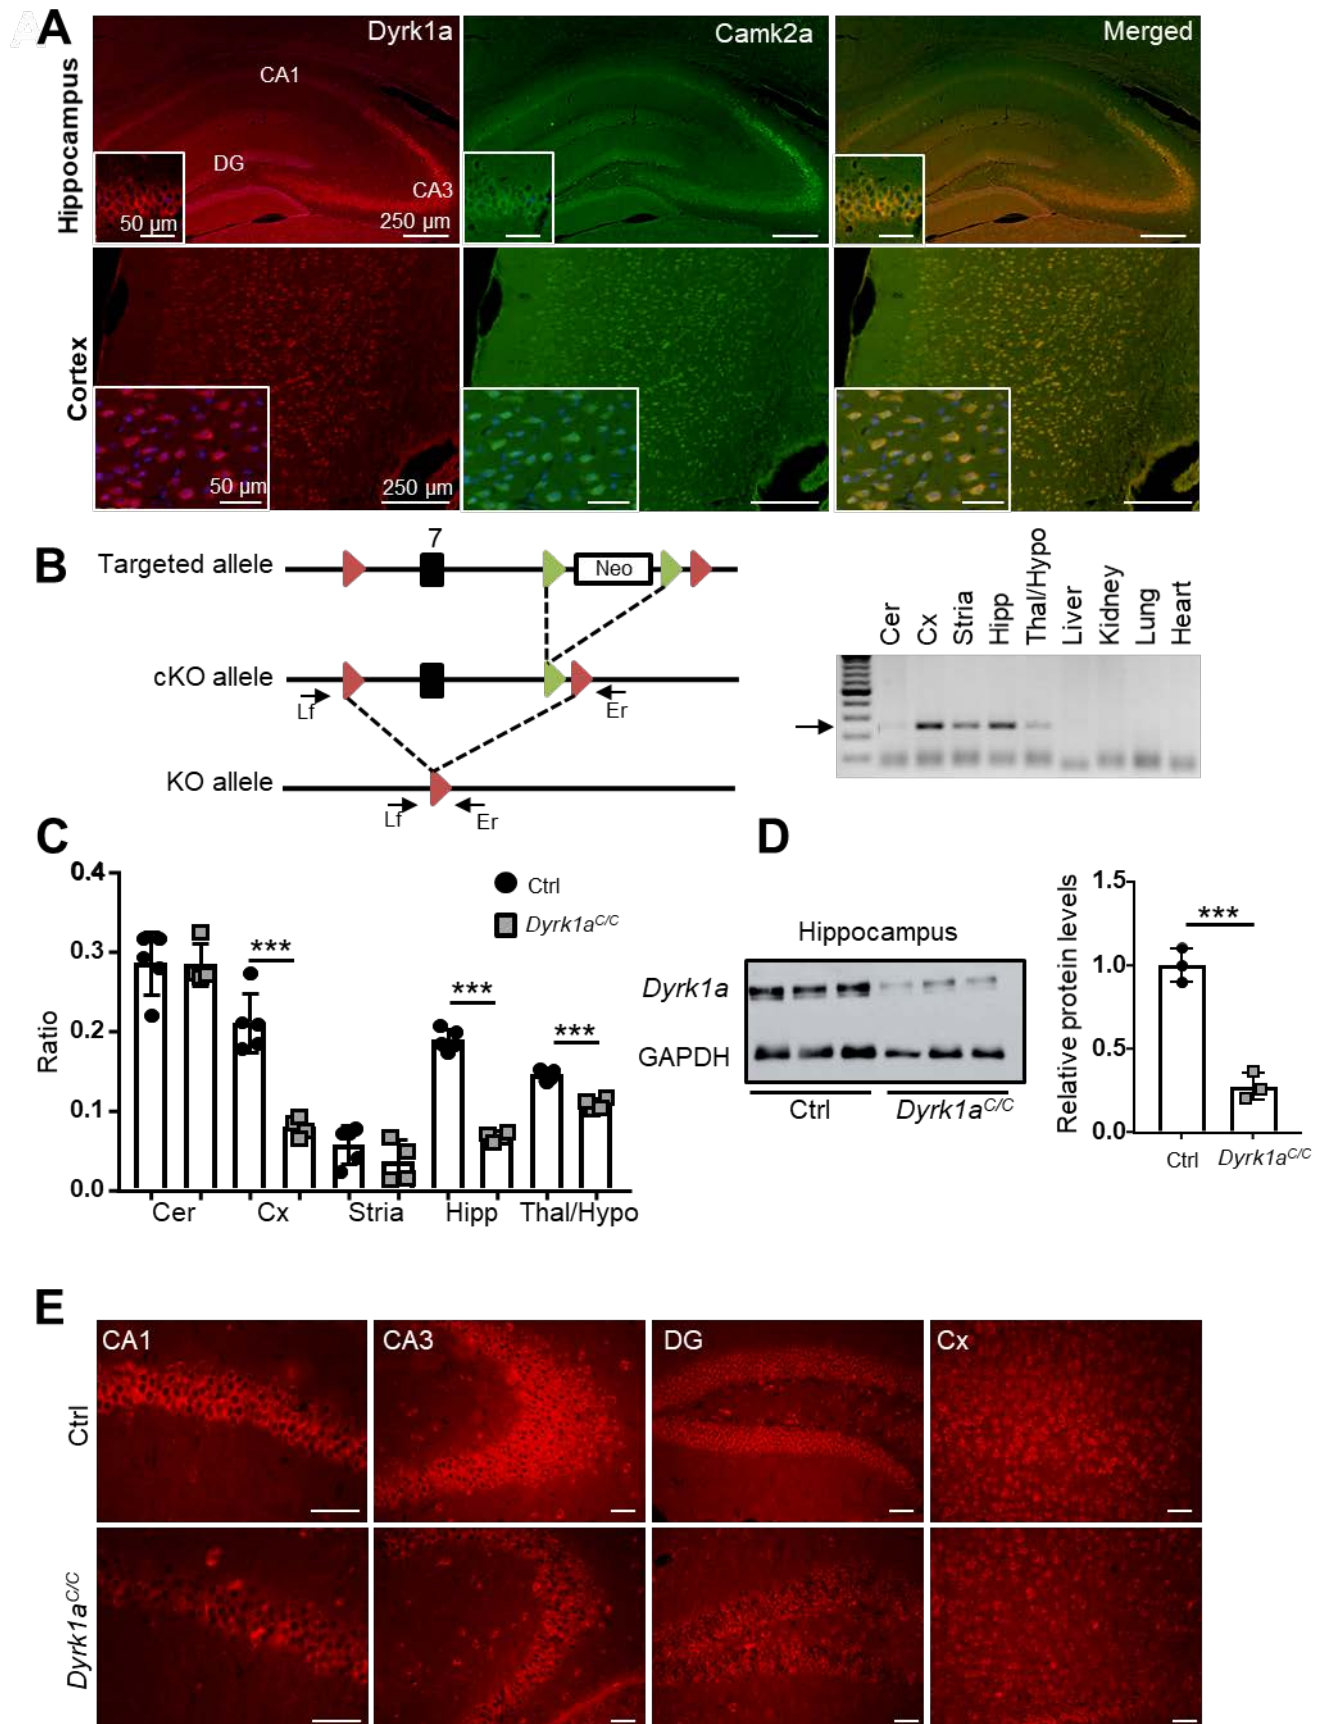

805 **Figure 1: Generation of mice deficient for *Dyrk1a* in the glutamatergic neurons.** (A)  
806 DYRK1A (red) co-localizes with CAMK2A (green) in the glutamatergic pyramidal neurons of  
807 the CA1-3, the granular neurons of the dentate gyrus (DG) and in the cortex. (B) Targeting  
808 strategy for conditional inactivation of *Dyrk1a*. Exon 7 containing the serine/threonine protein  
809 kinase active site was flanked with loxP sites (red arrowheads) in two steps: a targeted allele  
810 was first generated by homologous recombination in ES cells, then *in vivo* expression of the  
811 Flp recombinase resulted in recombination of the FRT sites (green arrowheads) and removal  
812 of the selection cassette (white box) generating the conditional allele (cKO). The knock-out  
813 allele (KO) was observed in the brain of *Dyrk1a*<sup>C/C</sup>. Arrows represent primers for PCR  
814 genotyping. Genomic DNA was isolated from different organs from a *Dyrk1a*<sup>C/C</sup> mouse and  
815 genotyped for the presence of the knock-out allele with primers Lf and Er, giving a 232 bp PCR  
816 product for the KO allele. (C) Ratio of relative mRNA of *Dyrk1a* in different brain structures  
817 in *Dyrk1a*<sup>C/C</sup> and disomic control mice. (D) Autoradiographic image and quantification of  
818 immunoblots of DYRK1A protein in the hippocampus of *Dyrk1a*<sup>C/C</sup> mice relative to control  
819 mice. Band intensities were estimated using ImageJ and normalized against the loading control  
820 GAPDH. (E) DYRK1A immunohistochemistry of coronal brain sections at the level of the  
821 hippocampus from control and *Dyrk1a*<sup>C/C</sup> mice. Data are presented as point plots with mean ±  
822 SD with unpaired Student's t-test, \*p<0.05, \*\*p<0.01, \*\*\*p<0.001 (n=5 ctrl and 4 *Dyrk1a*<sup>C/C</sup>  
823 hippocampus for mRNA analysis and n=3 per genotype for protein analysis). CA1, Cornus  
824 Ammonis 1; CA3, Cornus Ammonis 3; DG, Dentate Gyrus; Cer: Cerebellum; Cx, Cortex.  
825

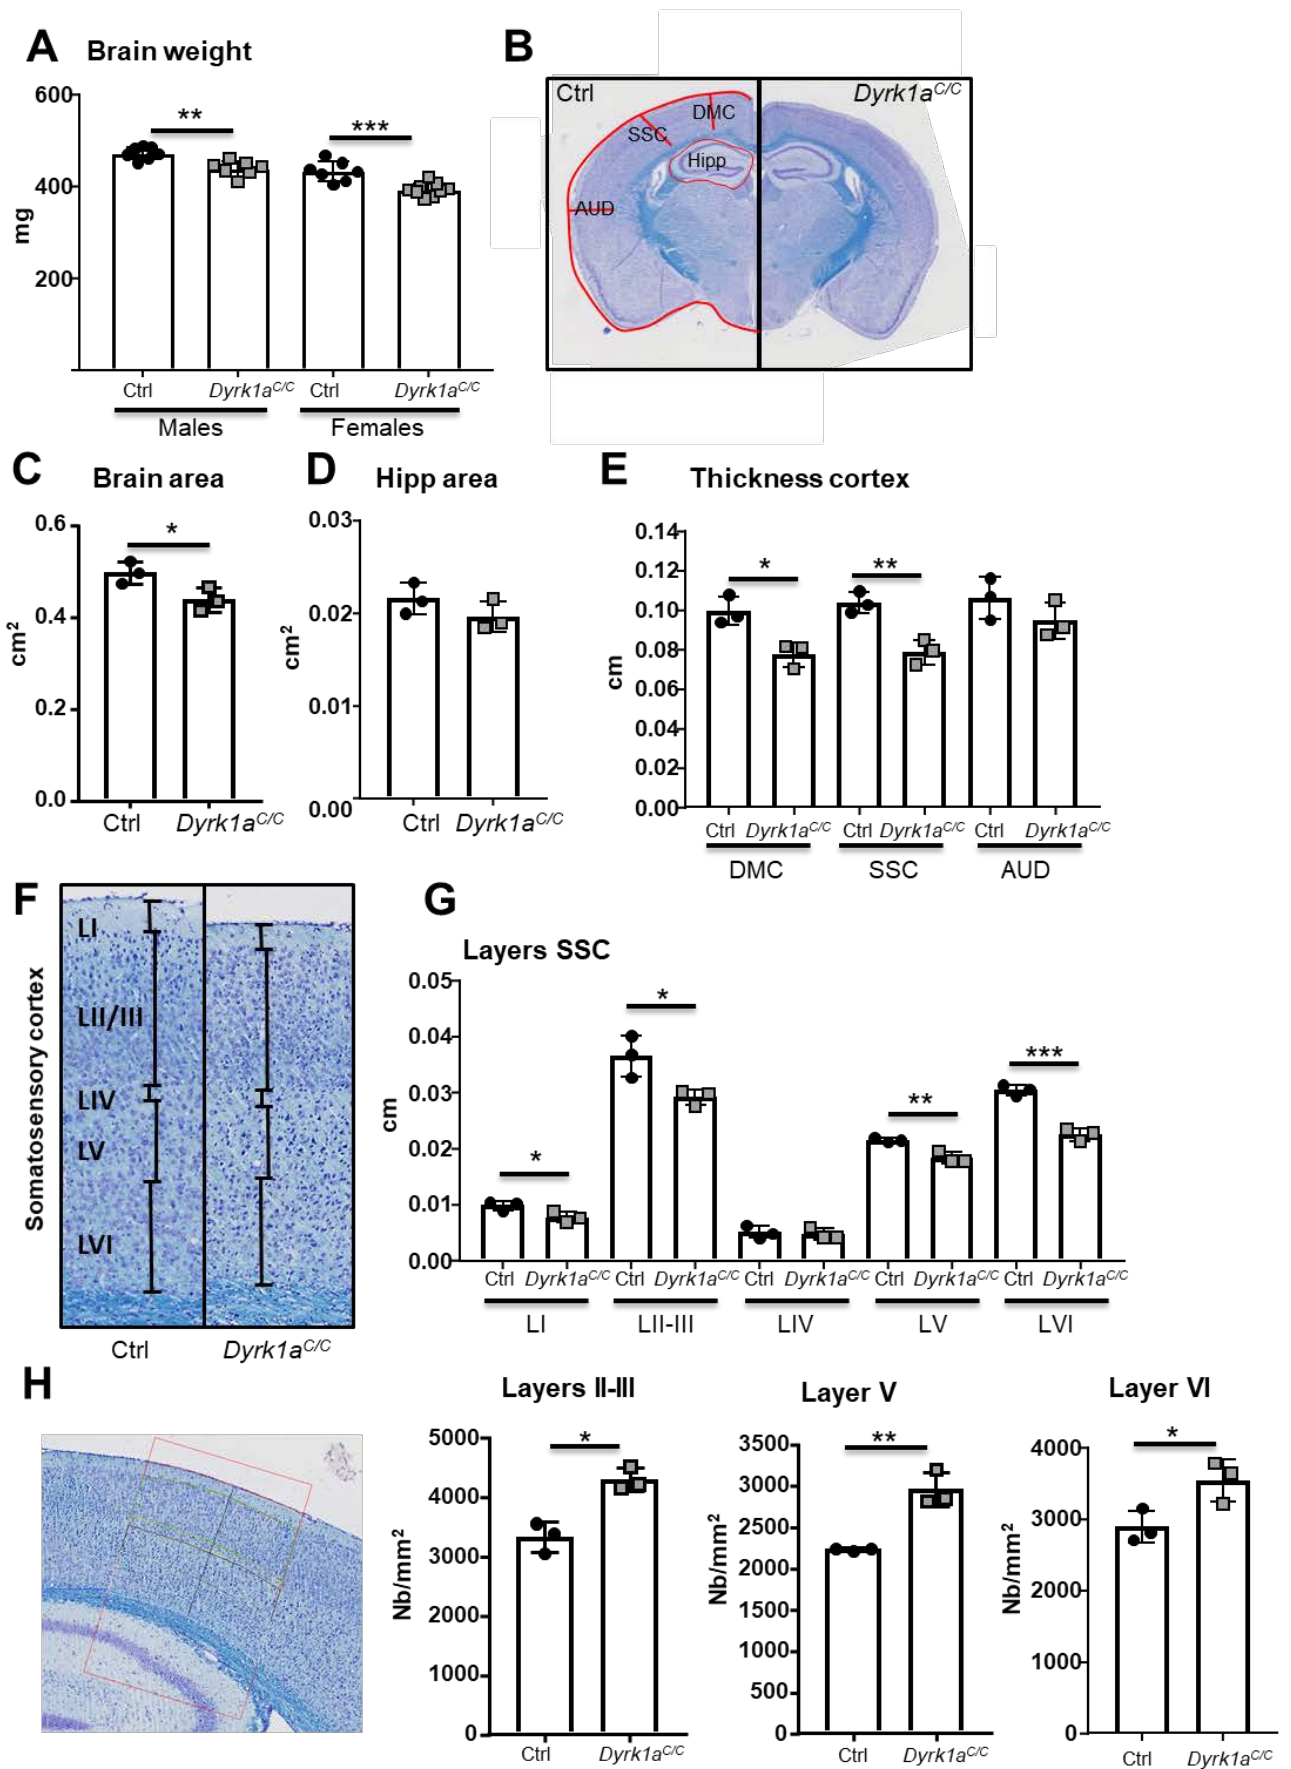

827 **Figure 2: Consequence of *Dyrk1a* inactivation in glutamatergic neurons on brain**  
828 **morphology.** (A) Brain weight from male and female mice aged 3 months old (n=7-9 per  
829 genotype). (B) Representative coronal sections of control (Ctrl) (left) and *Dyrk1a<sup>C/C</sup>* (right)  
830 brains at Bregma -1.5 stained with cresyl violet and luxol blue that were used for measurements  
831 (Magnification 20X). (C) Dot plots of total brain area measurements (red line around the brain  
832 in B). (D) Dot plots of hippocampal areas (red area around hipp in B). (E) Measurements of the  
833 thickness of the cortex at the 3 levels represented by red lines in figure B. (F) Representative  
834 cresyl violet and luxol blue stained coronal sections of somatosensory cortex layers in control  
835 (ctrl) and *Dyrk1a<sup>C/C</sup>* brains at Bregma -1.5. (G) Measurements of the thickness of the different  
836 layers presented in figure F. (H) Relative density of cells counted in layers II-III, V and VI  
837 within a frame of 0.1 cm width (see figure) at the level of the somatosensory cortex. Data are  
838 presented as point plots with mean  $\pm$  SD with unpaired Student's t-test, \*p<0.05, \*\*p<0.01,  
839 \*\*\*p<0.001 (n=3 females per genotype). AUD: auditory cortex, SSC: somatosensory cortex,  
840 DMC: dorso motor cortex, Hipp: hippocampus.

841



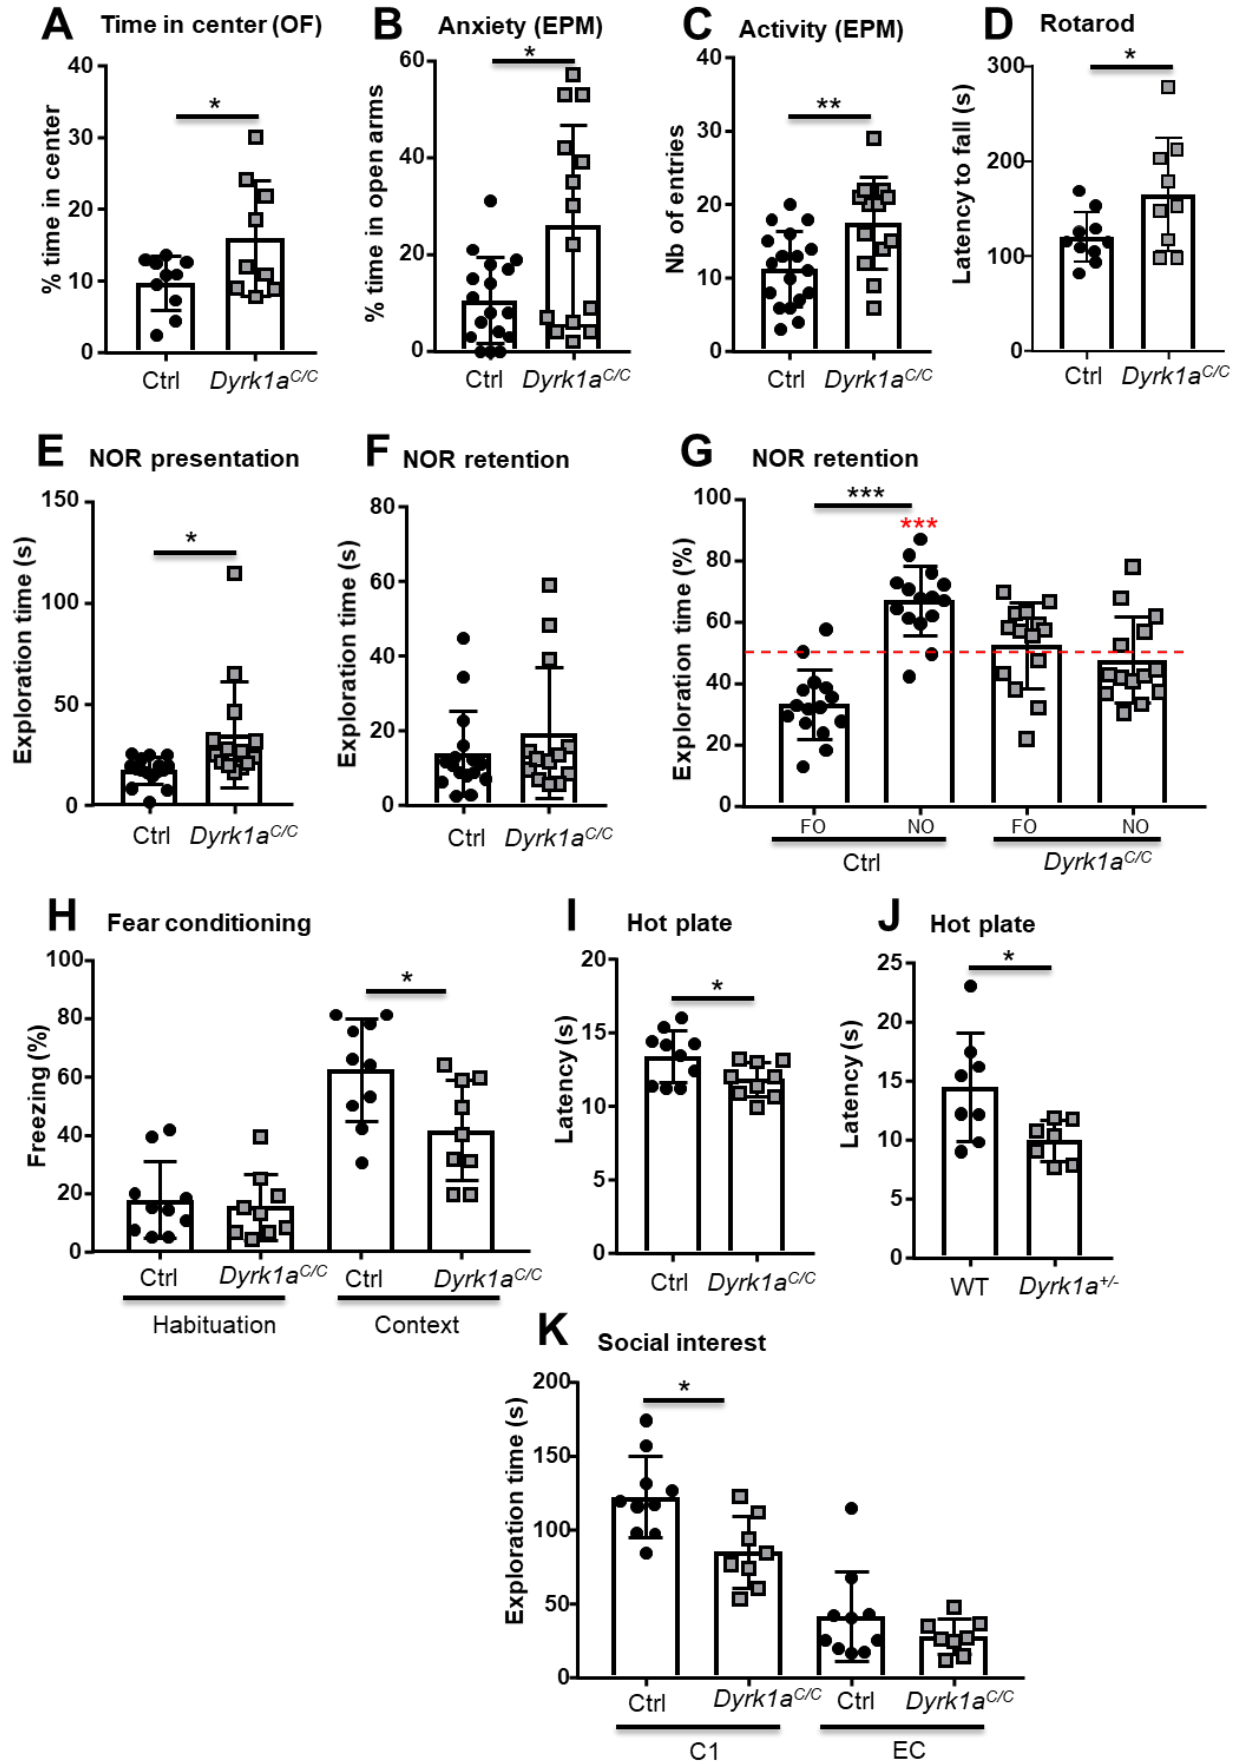

843 **Figure 3: Impact of *Dyrk1a* inactivation in glutamatergic neurons on general behavior,**  
844 **locomotor activity and cognition.** (A) The exploratory behavior of a new environment was  
845 analyzed by the percentage of time spent in the center of an open field over 30 min of test.  
846 *Dyrk1a*<sup>C/C</sup> mice spent more time in the center of the arena, suggesting that they are less anxious.  
847 (B) Confirmation of the phenotype in a new group of mice using the Elevated Plus Maze test  
848 (EPM) with *Dyrk1a*<sup>C/C</sup> mice showing a higher percentage of time spent in the open arms of the  
849 maze. (C) Mouse activity, measured by the number of entries in both open and closed arms,  
850 was increased in *Dyrk1a*<sup>C/C</sup> animals. (D) Evaluation of the locomotor performance on the  
851 rotarod during consecutive trials with increased rotational speeds. The latency is the mean of 3  
852 independent trials. *Dyrk1a*<sup>C/C</sup> mice showed increased performance. (E) In the NOR test, the  
853 percentage of time spent exploring the familiar (FO) and the new (NO) objects show that control  
854 mice spend significantly more time on the NO while *Dyrk1a*<sup>C/C</sup> mice do not make any difference  
855 between the two objects. (F) Exploration times of the two identical objects during the  
856 presentation phase of the NOR show that *Dyrk1a*<sup>C/C</sup> mice tend to have an increased exploration  
857 time. (G) Total exploratory time of the two objects during the test indicates that the absence of  
858 object discrimination of the *Dyrk1a*<sup>C/C</sup> mice is not due to a lack of interest of the objects. (H)  
859 Percentage of freezing time during the habituation phase (before the foot shock; basal level of  
860 activity) (Habituation; Mann-Whitney rank sum test, p=0.71) and during the 6 min of contextual  
861 exposure 24 hours later indicate a deficit of contextual learning in *Dyrk1a*<sup>C/C</sup> mice. (I-J) Pain  
862 sensitivity was evaluated by measuring the mouse latency to elicit a response to pain when put  
863 on a plate (52°C). In this test, *Dyrk1a*<sup>C/C</sup> and *Dyrk1a*<sup>+/-</sup> mice had a lower threshold than their  
864 control littermates. (K) Interest in social interaction was measured by the time spent sniffing  
865 the cage containing a congener (C1) during the Crawley test. This time was reduced for  
866 *Dyrk1a*<sup>C/C</sup> mice compared to control mice (unpaired t-test p=0.01) while the time spent  
867 exploring the empty cage (EC) was the same between the two groups (unpaired t-test p=0.23).



868 Data are presented as point plots with mean  $\pm$  SD. Statistical analyses were done with unpaired  
 869 Student's t-test or Mann-Whitney rank sum test if normality test failed, except E: paired T-test  
 870 FO vs NO and one sample T-test vs 50% mean (in red: \*\*\* $p < 0.001$ );  $n = 8-10$  per genotype. B-  
 871 C (EPM) and E-G (NOR) were done with another batch of mice,  $n = 14-15$  per genotype;  
 872 \* $p < 0.05$ , \*\* $p < 0.01$ , \*\*\* $p < 0.001$ .

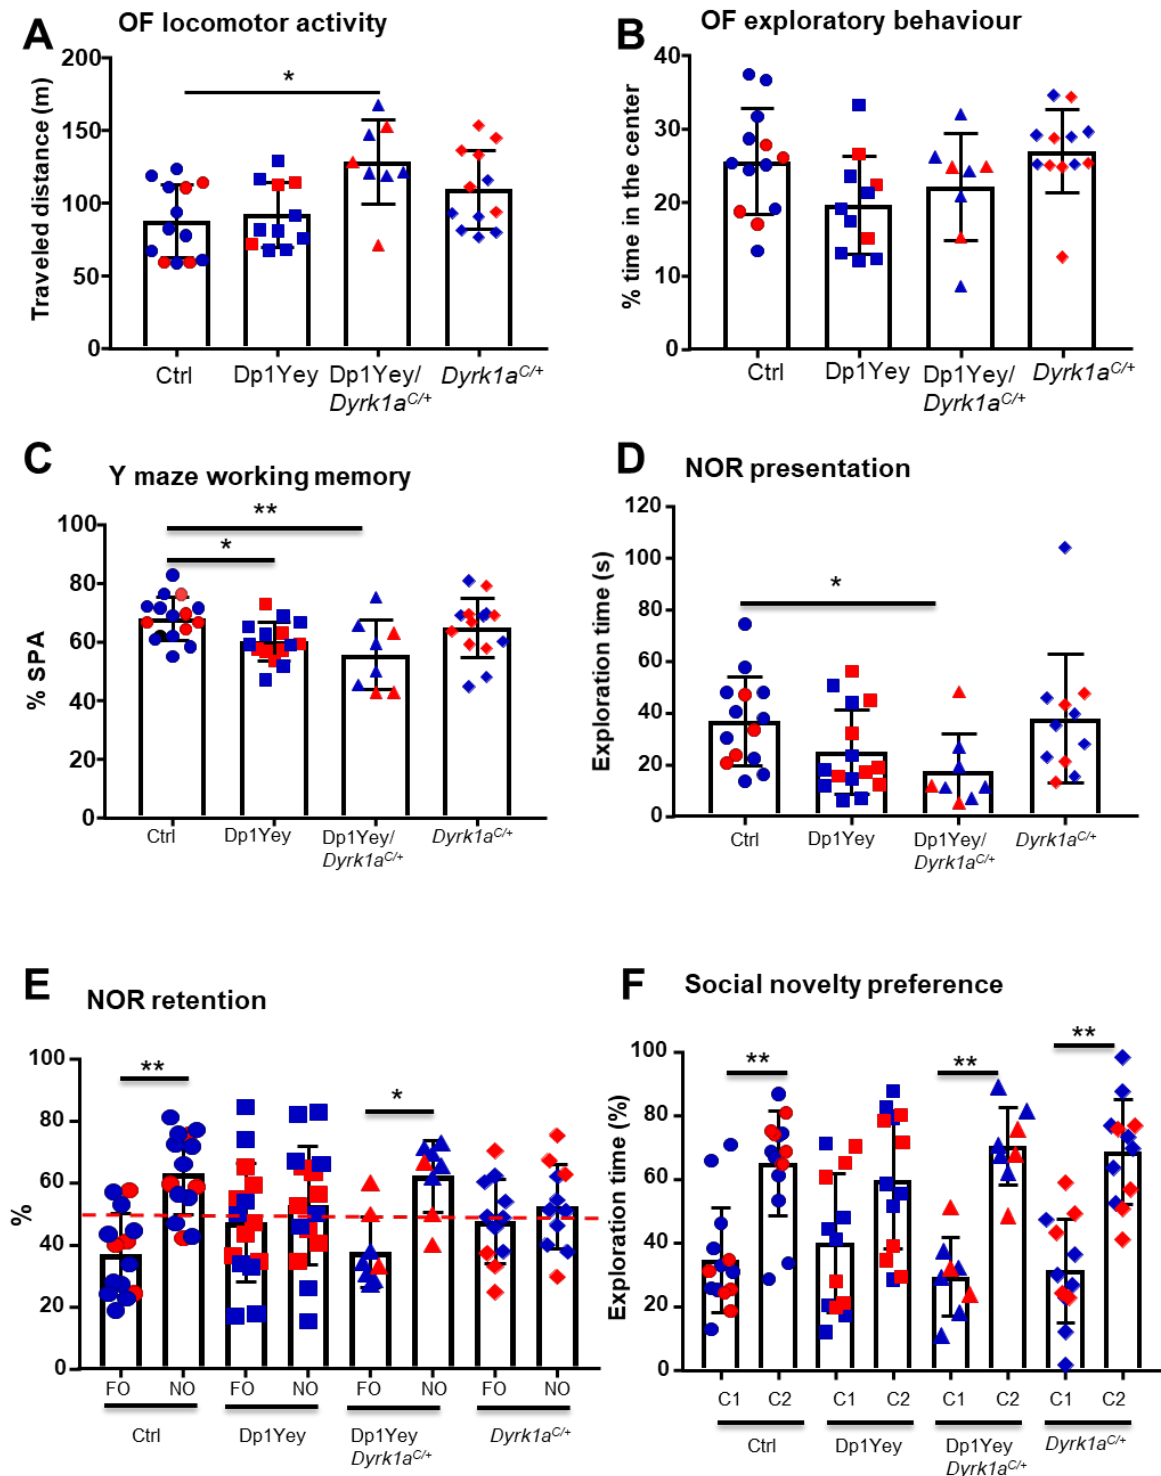

874 **Figure 4: Consequence of the normalization of *Dyrk1a* in glutamatergic neurons of**  
875 **Dp1Yey mice on animal cognition.** (A) The total distance travelled in the open field during a  
876 30 min session is significantly increased in the Dp1Yey/*Dyrk1a*<sup>C/+</sup> mice compared to the control  
877 mice (Kruskal-Wallis One Way Analysis of Variance on Ranks,  $p=0.009$  with Dunn's post hoc  
878 multiple comparison procedures versus control, Dp1Yey/*Dyrk1*<sup>C/+</sup> vs control,  $p=0.007$ ). (B)  
879 Percentage time spent in the center of the OF does not vary between genotypes (One way  
880 ANOVA,  $F(3, 40)=2.76$ ,  $p=0.054$ ). (C) Percentage of spontaneous alternation of the mice  
881 during a 5 min session in a Y-maze. Lower percentage of alternation was found in Dp1Yey  
882 mice and in Dp1Yey/*Dyrk1a*<sup>C/+</sup> indicating a deficit in working memory in Dp1Yey mice that is  
883 not rescued in Dp1Yey/*Dyrk1a*<sup>C/+</sup> mice (One way ANOVA, Holm-Sidak method for multiple  
884 comparisons versus control group,  $F(3,49)=4.3$ ,  $p=0.009$ , Dp1Yey vs control  $q=2.48$ ,  $p=0.03$ ,  
885 Dp1Yey/*Dyrk1a*<sup>C/+</sup>  $q=3.24$ ,  $p=0.006$ ). (D-E) Novel object recognition was assessed with 24  
886 hour time laps. (D) Time spent exploring the two identical objects during the first object  
887 presentation session was decreased in Dp1Yey/*Dyrk1a*<sup>C/+</sup> mice (Kruskal-Wallis One Way  
888 Analysis of Variance on Ranks,  $p=0.02$  with Dunn's post hoc multiple comparison procedures  
889 versus control, Dp1Yey/*Dyrk1a*<sup>C/+</sup> vs control,  $p=0.02$ ). (E) When introducing the novel object  
890 during the retention period, both control and Dp1Yey/*Dyrk1a*<sup>C/+</sup> lines spent significantly more  
891 time exploring the novel object than the familiar one (Paired t-test novel object vs familiar  
892 object, ctrl  $p=0.003$ , Dp1Yey/*Dyrk1a*<sup>C/+</sup>  $p=0.02$ ), whereas *Dp1Yey* and *Dyrk1a*<sup>C/+</sup> mice did not  
893 (Paired t-test novel object vs familiar object, Dp1Yey  $p=0.57$ , *Dyrk1a*<sup>C/+</sup>  $p=0.56$ ), revealing a  
894 significant deficit in memory for both Dp1Yey and *Dyrk1a*<sup>C/+</sup> mice which is rescued in  
895 Dp1Yey/*Dyrk1a*<sup>C/+</sup> mice. (F) Mice were tested for social novelty preference. All the genotypes  
896 but Dp1Yey spent significantly more time sniffing the new congener (Paired t-test congener vs  
897 empty cage, ctrl  $p=0.004$ , Dp1Yey  $p=0.13$ , Dp1Yey/*Dyrk1a*<sup>C/+</sup>  $p=0.002$ , *Dyrk1a*<sup>C/+</sup>  $p=0.002$ ).  
898 Data are presented as point plots with mean  $\pm$  SD. (n=8-15 per genotype, \* $p<0.05$ , \*\* $p<0.01$ )

899 Males (in blue) and females (in red) are pooled in the same graph as the statistical analyses did  
 900 not reveal significant effect of sex.

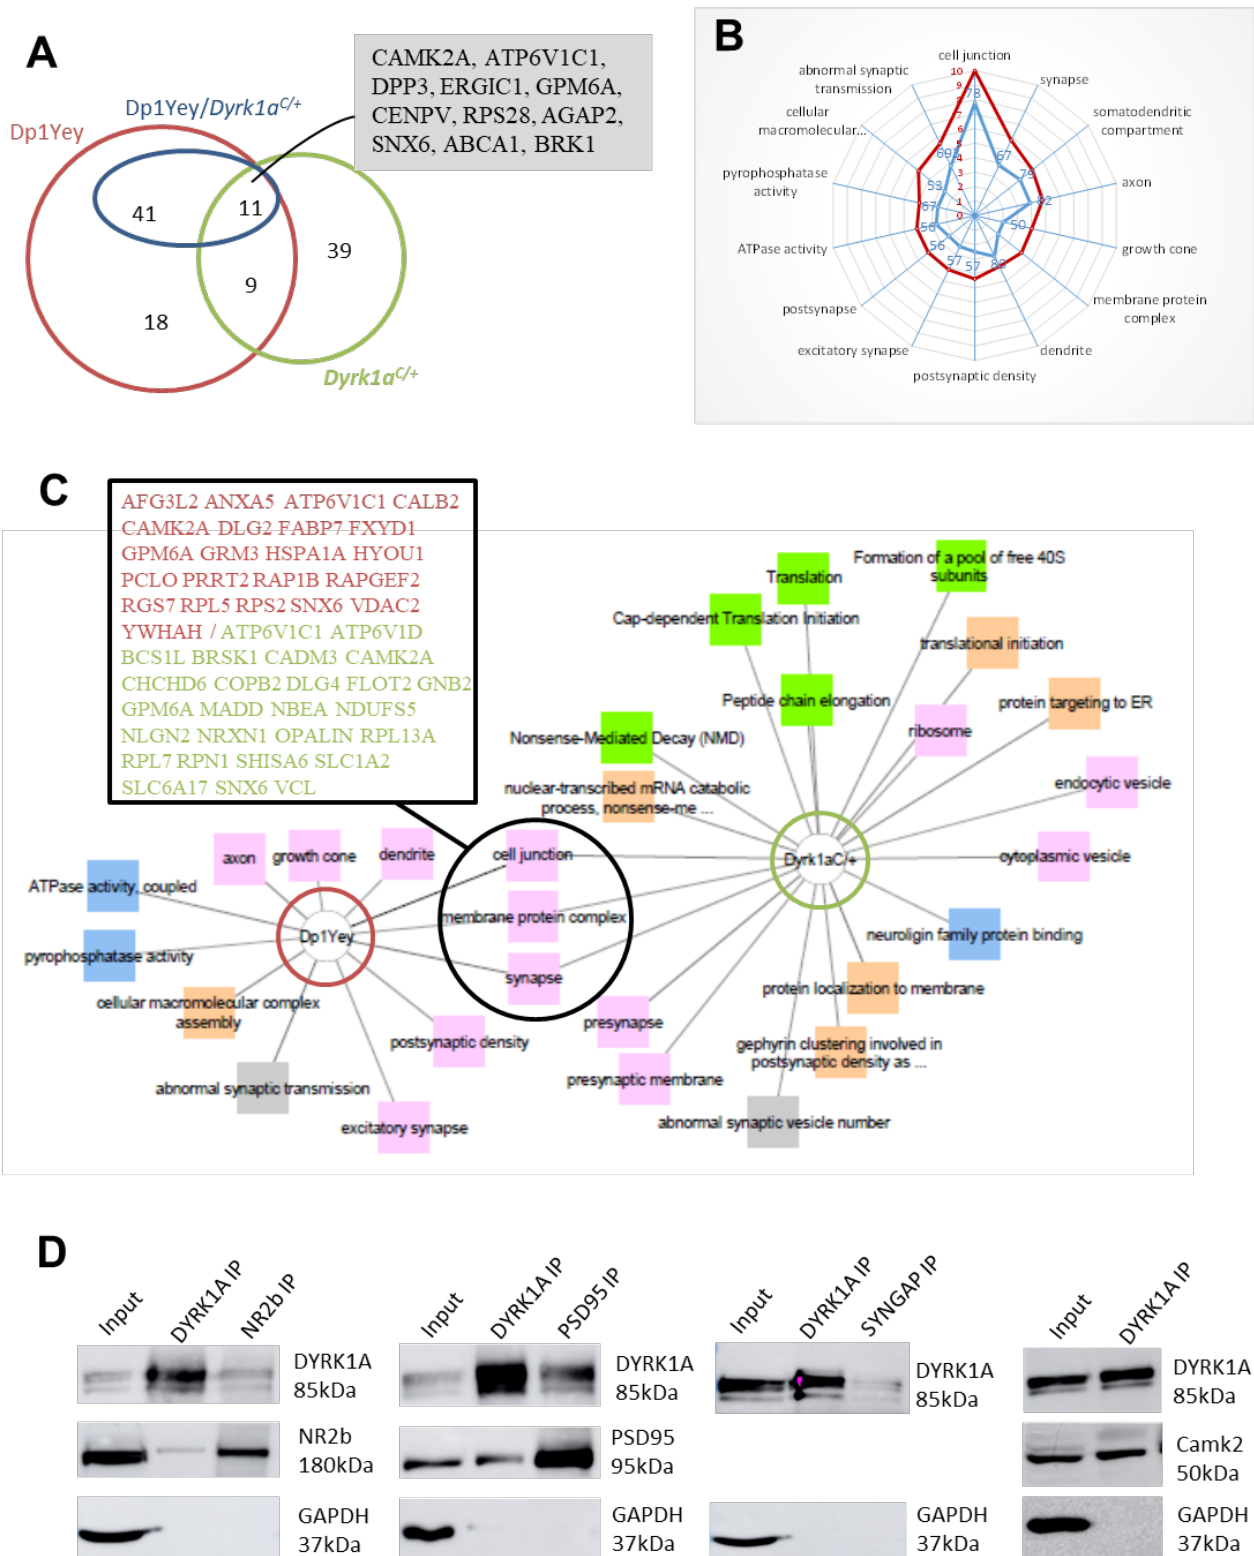

901

902

903 **Figure 5: Proteomic analysis (A)** Venn diagram showing the numbers of deregulated proteins  
904 in the different mouse models. The numbers of proteins shown for the *Dp1Yey/Dyrk1a<sup>C/+</sup>*  
905 model (in dark blue) correspond to proteins that were deregulated in the *Dp1Yey* and back to  
906 normal levels in this model (proteins that are regulated by *Dyrk1a* in the trisomy). Proteins  
907 deregulated by both *Dyrk1a* up and down-regulation (common to *Dp1Yey*, *Dp1Yey/Dyrk1a<sup>C/+</sup>*  
908 and *Dyrk1a<sup>C/+</sup>*) are listed in the grey shaded box. (B) Radar plots of GO terms that are mostly  
909 enriched in the *Dp1Yey* model (in red with scale bar corresponding to the log of the p-value)  
910 and of the proportion of the proteins found deregulated in *Dp1Yey* which amount is normalized  
911 by the return in 2 copies in the *Dp1Yey/Dyrk1a<sup>C/+</sup>* model (in blue with scale bar corresponding  
912 to the % of *Dp1Yey* deregulated protein back to normal levels). (C) Visual representation of  
913 the GO enrichments for the deregulated proteins in *Dp1Yey* and *Dyrk1a<sup>C/+</sup>* hippocampi with  
914 connection between common terms. The different categories of GO are represented by different  
915 colors: pink for “Cellular components”, blue for “Molecular functions”, green for “Pathways”,  
916 orange for “Biological processes” and grey for “Phenotypes”. The list of proteins in the box  
917 corresponds to proteins present in the common deregulated GO terms (in red deregulated  
918 proteins in *Dp1Yey* and in green proteins deregulated in *Dyrk1a<sup>C/+</sup>*). (D) Western blots of  
919 DYRK1A, NR2B, PSD95, SYNGAP and CAMK2 proteins following IPs of wild-type mice  
920 brain extracts. We found in NR2B, PSD95 and CAMK2 in the IPs of DYRK1A. We also  
921 detected DYRK1A in the IPs of NR2B, PSD95 and SYNGAP.

922

## 923 **References**

924

- 925 1. Duchon A, Hérault Y. DYRK1A, a Dosage-Sensitive Gene Involved in  
926 Neurodevelopmental Disorders, Is a Target for Drug Development in Down Syndrome. *Front*  
927 *Behav Neurosci.* 2016;10:104. Epub 2016/06/03. doi: 10.3389/fnbeh.2016.00104. PubMed  
928 PMID: 27375444; PubMed Central PMCID: PMC4891327.
- 929 2. Moller RS, Kuebart S, Hoeltzenbein M, Heye B, Vogel I, Hansen CP, et al. Truncation  
930 of the Down syndrome candidate gene DYRK1A in two unrelated patients with microcephaly.

- 931 American Journal of Human Genetics. 2008;82(5):1165-70. doi: 10.1016/j.ajhg.2008.03.001.  
932 PubMed PMID: WOS:000255923600016.
- 933 3. Fujita H, Torii C, Kosaki R, Yamaguchi S, Kudoh J, Hayashi K, et al. Microdeletion of  
934 the Down Syndrome Critical Region at 21q22. American Journal of Medical Genetics Part A.  
935 2010;152A(4):950-3. doi: 10.1002/ajmg.a.33228. PubMed PMID: WOS:000276754000023.
- 936 4. Yamamoto T, Shimojima K, Nishizawa T, Matsuo M, Ito M, Imai K. Clinical  
937 Manifestations of the Deletion of Down Syndrome Critical Region Including DYRK1A and  
938 KCNJ6. American Journal of Medical Genetics Part A. 2011;155A(1):113-9. doi:  
939 10.1002/ajmg.a.33735. PubMed PMID: WOS:000285889100015.
- 940 5. Valetto A, Orsini A, Bertini V, Toschi B, Bonuccelli A, Simi F, et al. Molecular  
941 cytogenetic characterization of an interstitial deletion of chromosome 21 (21q22.13q22.3) in a  
942 patient with dysmorphic features, intellectual disability and severe generalized epilepsy.  
943 European Journal of Medical Genetics. 2012;55(5):362-6. doi: 10.1016/j.ejmg.2012.03.011.  
944 PubMed PMID: WOS:000307540100015.
- 945 6. Bronicki LM, Redin C, Drunat S, Piton A, Lyons M, Passemard S, et al. Ten new cases  
946 further delineate the syndromic intellectual disability phenotype caused by mutations in  
947 DYRK1A. Eur J Hum Genet. 2015;23(11):1482-7. Epub 2015/04/29. doi:  
948 10.1038/ejhg.2015.29. PubMed PMID: 25920557; PubMed Central PMCID:  
949 PMC4613470.
- 950 7. Ji JL, Lee H, Argiropoulos B, Dorrani N, Mann J, Martinez-Agosto JA, et al. DYRK1A  
951 haploinsufficiency causes a new recognizable syndrome with microcephaly, intellectual  
952 disability, speech impairment, and distinct facies. European Journal of Human Genetics.  
953 2015;23(11):1473-81. doi: 10.1038/ejhg.2015.71. PubMed PMID: WOS:000362916200010.
- 954 8. Arron JR, Winslow MM, Polleri A, Chang CP, Wu H, Gao X, et al. NFAT dysregulation  
955 by increased dosage of DSCR1 and DYRK1A on chromosome 21. Nature.  
956 2006;441(7093):595-600. Epub 2006/03/22. doi: 10.1038/nature04678. PubMed PMID:  
957 16554754.
- 958 9. Soppa U, Schumacher J, Florencio Ortiz V, Pasqualon T, Tejedor FJ, Becker W. The  
959 Down syndrome-related protein kinase DYRK1A phosphorylates p27(Kip1) and Cyclin D1 and  
960 induces cell cycle exit and neuronal differentiation. Cell Cycle. 2014;13(13):2084-100. Epub  
961 2014/05/07. doi: 10.4161/cc.29104. PubMed PMID: 24806449; PubMed Central PMCID:  
962 PMC4111700.
- 963 10. Ahn KJ, Jeong HK, Choi HS, Ryoo SR, Kim YJ, Goo JS, et al. DYRK1A BAC  
964 transgenic mice show altered synaptic plasticity with learning and memory defects. Neurobiol  
965 Dis. 2006;22(3):463-72. Epub 2006/02/07. doi: 10.1016/j.nbd.2005.12.006. PubMed PMID:  
966 16455265.
- 967 11. Altafaj X, Dierssen M, Baamonde C, Martí E, Visa J, Guimerà J, et al.  
968 Neurodevelopmental delay, motor abnormalities and cognitive deficits in transgenic mice  
969 overexpressing Dyrk1A (minibrain), a murine model of Down's syndrome. Hum Mol Genet.  
970 2001;10(18):1915-23. PubMed PMID: 11555628.
- 971 12. Arqué G, Fotaki V, Fernández D, Martínez de Lagrán M, Arbonés ML, Dierssen M.  
972 Impaired spatial learning strategies and novel object recognition in mice haploinsufficient for  
973 the dual specificity tyrosine-regulated kinase-1A (Dyrk1A). PLoS One. 2008;3(7):e2575. Epub  
974 2008/07/02. doi: 10.1371/journal.pone.0002575. PubMed PMID: 18648535; PubMed Central  
975 PMCID: PMC2481280.
- 976 13. Kleschevnikov AM, Belichenko PV, Villar AJ, Epstein CJ, Malenka RC, Mobley WC.  
977 Hippocampal long-term potentiation suppressed by increased inhibition in the Ts65Dn mouse,  
978 a genetic model of Down syndrome. J Neurosci. 2004;24(37):8153-60. doi:  
979 10.1523/JNEUROSCI.1766-04.2004. PubMed PMID: 15371516.



- 980 14. Siarey RJ, Carlson EJ, Epstein CJ, Balbo A, Rapoport SI, Galdzicki Z. Increased  
981 synaptic depression in the Ts65Dn mouse, a model for mental retardation in Down syndrome.  
982 *Neuropharmacology*. 1999;38(12):1917-20. doi: 10.1016/s0028-3908(99)00083-0. PubMed  
983 PMID: WOS:000083790900012.
- 984 15. Boada R, Hutaff-Lee C, Schrader A, Weitzenkamp D, Benke TA, Goldson EJ, et al.  
985 Antagonism of NMDA receptors as a potential treatment for Down syndrome: a pilot  
986 randomized controlled trial. *Translational Psychiatry*. 2012;2. doi: 10.1038/tp.2012.66.  
987 PubMed PMID: WOS:000209337200002.
- 988 16. Cramer N, Galdzicki Z. From Abnormal Hippocampal Synaptic Plasticity in Down  
989 Syndrome Mouse Models to Cognitive Disability in Down Syndrome. *Neural Plasticity*.  
990 2012;2012. doi: 10.1155/2012/101542. PubMed PMID: WOS:000307581200001.
- 991 17. García-Cerro S, Martínez P, Vidal V, Corrales A, Flórez J, Vidal R, et al.  
992 Overexpression of Dyrk1A is implicated in several cognitive, electrophysiological and  
993 neuromorphological alterations found in a mouse model of Down syndrome. *PLoS One*.  
994 2014;9(9):e106572. Epub 2014/09/04. doi: 10.1371/journal.pone.0106572. PubMed PMID:  
995 25188425; PubMed Central PMCID: PMC4154723.
- 996 18. Altafaj X, Martín ED, Ortiz-Abalia J, Valderrama A, Lao-Peregrín C, Dierssen M, et al.  
997 Normalization of Dyrk1A expression by AAV2/1-shDyrk1A attenuates hippocampal-  
998 dependent defects in the Ts65Dn mouse model of Down syndrome. *Neurobiol Dis*.  
999 2013;52:117-27. Epub 2012/12/05. doi: 10.1016/j.nbd.2012.11.017. PubMed PMID:  
1000 23220201.
- 1001 19. Fotaki V, Dierssen M, Alcántara S, Martínez S, Martí E, Casas C, et al. Dyrk1A  
1002 haploinsufficiency affects viability and causes developmental delay and abnormal brain  
1003 morphology in mice. *Mol Cell Biol*. 2002;22(18):6636-47. PubMed PMID: 12192061; PubMed  
1004 Central PMCID: PMC135639.
- 1005 20. Mantamadiotis T, Lemberger T, Bleckmann SC, Kern H, Kretz O, Martin Villalba A, et  
1006 al. Disruption of CREB function in brain leads to neurodegeneration. *Nat Genet*. 2002;31(1):47-  
1007 54. Epub 2002/04/22. doi: 10.1038/ng882. PubMed PMID: 11967539.
- 1008 21. Duchon A, Raveau M, Chevalier C, Nalesso V, Sharp AJ, Herault Y. Identification of  
1009 the translocation breakpoints in the Ts65Dn and Ts1Cje mouse lines: relevance for modeling  
1010 down syndrome. *Mammalian Genome*. 2011;22(11-12):674-84. doi: 10.1007/s00335-011-  
1011 9356-0. PubMed PMID: WOS:000297544700004.
- 1012 22. Martí E, Altafaj X, Dierssen M, de la Luna S, Fotaki V, Alvarez M, et al. Dyrk1A  
1013 expression pattern supports specific roles of this kinase in the adult central nervous system.  
1014 *Brain Res*. 2003;964(2):250-63. PubMed PMID: 12576186.
- 1015 23. Kinnavane L, Amin E, Olarte-Sanchez CM, Aggleton JP. Detecting and Discriminating  
1016 Novel Objects: The Impact of Perirhinal Cortex Disconnection on Hippocampal Activity  
1017 Patterns. *Hippocampus*. 2016;26(11):1393-413. doi: 10.1002/hipo.22615. PubMed PMID:  
1018 WOS:000387590300003.
- 1019 24. Bussey TJ, Saksidal LM. Memory, perception, and the ventral visual-perirhinal-  
1020 hippocampal stream: Thinking outside of the boxes. *Hippocampus*. 2007;17(9):898-908. doi:  
1021 10.1002/hipo.20320. PubMed PMID: WOS:000249423700018.
- 1022 25. Fernandez G, Tendolkar I. The rhinal cortex: 'gatekeeper' of the declarative memory  
1023 system. *Trends in Cognitive Sciences*. 2006;10(8):358-62. doi: 10.1016/j.tics.2006.06.003.  
1024 PubMed PMID: WOS:000240090900008.
- 1025 26. Rozeske RR, Valerio S, Chaudun F, Herry C. Prefrontal neuronal circuits of contextual  
1026 fear conditioning. *Genes Brain and Behavior*. 2015;14(1):22-36. doi: 10.1111/gbb.12181.  
1027 PubMed PMID: WOS:000349030000003.
- 1028 27. Spiegel I, Mardinly AR, Gabel HW, Bazinet JE, Couch CH, Tzeng CP, et al. Npas4  
1029 Regulates Excitatory-Inhibitory Balance within Neural Circuits through Cell-Type-Specific

- 1030 Gene Programs. *Cell*. 2014;157(5):1216-29. doi: 10.1016/j.cell.2014.03.058. PubMed PMID:  
1031 WOS:000336437200021.
- 1032 28. Jiang X, Liu C, Yu T, Zhang L, Meng K, Xing Z, et al. Genetic dissection of the Down  
1033 syndrome critical region. *Hum Mol Genet*. 2015;24(22):6540-51. Epub 2015/09/15. doi:  
1034 10.1093/hmg/ddv364. PubMed PMID: 26374847; PubMed Central PMCID:  
1035 PMCPMC4614710.
- 1036 29. Hilfiker S, Benfenati F, Doussau FDR, Nairn AC, Czernik AJ, Augustine GJ, et al.  
1037 Structural domains involved in the regulation of transmitter release by synapsins. *Journal of*  
1038 *Neuroscience*. 2005;25(10):2658-69. doi: 10.1523/jneurosci.4278-04.2005. PubMed PMID:  
1039 WOS:000227528600025.
- 1040 30. Benfenati F, Valtorta F, Greengard P. COMPUTER MODELING OF SYNAPSIN-I  
1041 BINDING TO SYNAPTIC VESICLES AND F-ACTIN - IMPLICATIONS FOR  
1042 REGULATION OF NEUROTRANSMITTER RELEASE. *Proceedings of the National*  
1043 *Academy of Sciences of the United States of America*. 1991;88(2):575-9. doi:  
1044 10.1073/pnas.88.2.575. PubMed PMID: WOS:A1991ET52100054.
- 1045 31. Llinas R, Gruner JA, Sugimori M, McGuinness TL, Greengard P. REGULATION BY  
1046 SYNAPSIN-I AND CA<sup>2+</sup>-CALMODULIN-DEPENDENT PROTEIN-KINASE II OF  
1047 TRANSMITTER RELEASE IN SQUID GIANT SYNAPSE. *Journal of Physiology-London*.  
1048 1991;436:257-82. doi: 10.1113/jphysiol.1991.sp018549. PubMed PMID:  
1049 WOS:A1991FM06300015.
- 1050 32. Cesca F, Baldelli P, Valtorta F, Benfenati F. The synapsins: Key actors of synapse  
1051 function and plasticity. *Progress in Neurobiology*. 2010;91(4):313-48. doi:  
1052 10.1016/j.pneurobio.2010.04.006. PubMed PMID: WOS:000280321300004.
- 1053 33. Nguyen TL, Duchon A, Manousopoulou A, Loaëc N, Villiers B, Pani G, et al.  
1054 Correction of cognitive deficits in mouse models of Down syndrome by a pharmacological  
1055 inhibitor of DYRK1A. *Dis Model Mech*. 2018;11(9). Epub 2018/09/27. doi:  
1056 10.1242/dmm.035634. PubMed PMID: 30115750; PubMed Central PMCID:  
1057 PMCPMC6176987.
- 1058 34. Fukunaga K, Muller D, Miyamoto E. CaM kinase II in long-term potentiation.  
1059 *Neurochemistry International*. 1996;28(4):343-58. doi: 10.1016/0197-0186(95)00097-6.  
1060 PubMed PMID: WOS:A1996UH93800001.
- 1061 35. Guedj F, Pereira PL, Najas S, Barallobre MJ, Chabert C, Souchet B, et al. DYRK1A: a  
1062 master regulatory protein controlling brain growth. *Neurobiol Dis*. 2012;46(1):190-203. Epub  
1063 2012/01/26. doi: 10.1016/j.nbd.2012.01.007. PubMed PMID: 22293606.
- 1064 36. Benavides-Piccione R, Dierssen M, Ballesteros-Yáñez I, Martínez de Lagrán M,  
1065 Arbonés ML, Fotaki V, et al. Alterations in the phenotype of neocortical pyramidal cells in the  
1066 *Dyrk1A*<sup>+/-</sup> mouse. *Neurobiol Dis*. 2005;20(1):115-22. doi: 10.1016/j.nbd.2005.02.004.  
1067 PubMed PMID: 16137572.
- 1068 37. Dang T, Duan WY, Yu B, Tong DL, Cheng C, Zhang YF, et al. Autism-associated  
1069 *Dyrk1a* truncation mutants impair neuronal dendritic and spine growth and interfere with  
1070 postnatal cortical development. *Mol Psychiatry*. 2018;23(3):747-58. Epub 2017/02/07. doi:  
1071 10.1038/mp.2016.253. PubMed PMID: 28167836; PubMed Central PMCID:  
1072 PMCPMC5822466.
- 1073 38. Zhang CL, Houbaert X, Lepleux M, Deshors M, Normand E, Gambino F, et al. The  
1074 hippocampo-amygdala control of contextual fear expression is affected in a model of  
1075 intellectual disability. *Brain Structure & Function*. 2015;220(6):3673-82. doi: 10.1007/s00429-  
1076 014-0882-x. PubMed PMID: WOS:000361566000037.
- 1077 39. Fotaki V, Martínez De Lagrán M, Estivill X, Arbonés M, Dierssen M.  
1078 Haploinsufficiency of *Dyrk1A* in mice leads to specific alterations in the development and



- 1079 regulation of motor activity. *Behav Neurosci.* 2004;118(4):815-21. doi: 10.1037/0735-  
1080 7044.118.4.815. PubMed PMID: 15301607.
- 1081 40. Sawynok J, Liu XJ. Adenosine in the spinal cord and periphery: release and regulation  
1082 of pain. *Progress in Neurobiology.* 2003;69(5):313-40. doi: 10.1016/s0301-0082(03)00050-9.  
1083 PubMed PMID: WOS:000183596300002.
- 1084 41. Braudeau J, Delatour B, Duchon A, Pereira PL, Dauphinot L, de Chaumont F, et al.  
1085 Specific targeting of the GABA-A receptor alpha 5 subtype by a selective inverse agonist  
1086 restores cognitive deficits in Down syndrome mice. *Journal of Psychopharmacology.*  
1087 2011;25(8):1030-42. doi: 10.1177/0269881111405366. PubMed PMID:  
1088 WOS:000293756100003.
- 1089 42. Dragunow M. A role for immediate-early transcription factors in learning and memory.  
1090 *Behavior Genetics.* 1996;26(3):293-9. doi: 10.1007/bf02359385. PubMed PMID:  
1091 WOS:A1996UU94600007.
- 1092 43. Smith-Hicks CL, Cai P, Savonenko AV, Reeves RH, Worley PF. Increased Sparsity of  
1093 Hippocampal CA1 Neuronal Ensembles in a Mouse Model of Down Syndrome Assayed by Arc  
1094 Expression. *Front Neural Circuits.* 2017;11:6. Epub 2017/02/03. doi:  
1095 10.3389/fncir.2017.00006. PubMed PMID: 28217086; PubMed Central PMCID:  
1096 PMCPMC5289947.
- 1097 44. Murakami N, Xie W, Lu RC, Chen-Hwang MC, Wieraszko A, Hwang YW.  
1098 Phosphorylation of amphiphysin I by minibrain kinase/dual-specificity tyrosine  
1099 phosphorylation-regulated kinase, a kinase implicated in Down syndrome. *Journal of*  
1100 *Biological Chemistry.* 2006;281(33):23712-24. doi: 10.1074/jbc.M513497200. PubMed  
1101 PMID: WOS:000239702900046.
- 1102 45. Park JH, Jung MS, Kim YS, Song WJ, Chung SH. Phosphorylation of Munc18-1 by  
1103 Dyrk1A regulates its interaction with Syntaxin 1 and X11 $\alpha$ . *J Neurochem.* 2012;122(5):1081-  
1104 91. Epub 2012/08/03. doi: 10.1111/j.1471-4159.2012.07861.x. PubMed PMID: 22765017.
- 1105 46. Chen-Hwang MC, Chen HR, Elzinga M, Hwang YW. Dynamin is a minibrain  
1106 kinase/dual specificity Yak1-related kinase 1A substrate. *Journal of Biological Chemistry.*  
1107 2002;277(20):17597-604. doi: 10.1074/jbc.M111101200. PubMed PMID:  
1108 WOS:000175685100028.
- 1109 47. Adayev T, Chen-Hwang MC, Murakami N, Wang R, Hwang YW. MNB/DYRK1A  
1110 phosphorylation regulates the interactions of synaptojanin 1 with endocytic accessory proteins.  
1111 *Biochemical and Biophysical Research Communications.* 2006;351(4):1060-5. doi:  
1112 10.1016/j.bbrc.2006.10.169. PubMed PMID: WOS:000242425300043.
- 1113 48. Alemany-Gonzalez M, Gener T, Nebot P, Vilademunt M, Dierssen M, Puig MV.  
1114 Prefrontal-hippocampal functional connectivity encodes recognition memory and is impaired  
1115 in intellectual disability. *Proceedings of the National Academy of Sciences of the United States*  
1116 *of America.* 2020;117(21):11788-98. doi: 10.1073/pnas.1921314117. PubMed PMID:  
1117 WOS:000536797100076.
- 1118 49. Souchet B, Guedj F, Sahún I, Duchon A, Daubigney F, Badel A, et al.  
1119 Excitation/inhibition balance and learning are modified by Dyrk1a gene dosage. *Neurobiol Dis.*  
1120 2014;69:65-75. Epub 2014/05/04. doi: 10.1016/j.nbd.2014.04.016. PubMed PMID: 24801365.
- 1121 50. Souchet B, Guedj F, Penke-Verdier Z, Daubigney F, Duchon A, Herault Y, et al.  
1122 Pharmacological correction of excitation/inhibition imbalance in Down syndrome mouse  
1123 models. *Front Behav Neurosci.* 2015;9:267. Epub 2015/10/20. doi: 10.3389/fnbeh.2015.00267.  
1124 PubMed PMID: 26539088; PubMed Central PMCID: PMCPMC4611057.
- 1125 51. Yu T, Liu C, Belichenko P, Clapcote SJ, Li S, Pao A, et al. Effects of individual  
1126 segmental trisomies of human chromosome 21 syntenic regions on hippocampal long-term  
1127 potentiation and cognitive behaviors in mice. *Brain Res.* 2010;1366:162-71. Epub 2010/10/26.

- 1128 doi: 10.1016/j.brainres.2010.09.107. PubMed PMID: 20932954; PubMed Central PMCID:  
1129 PMCPMC3027718.
- 1130 52. Lalonde R. The neurobiological basis of spontaneous alternation. *Neuroscience and*  
1131 *Biobehavioral Reviews*. 2002;26(1):91-104. doi: 10.1016/s0149-7634(01)00041-0. PubMed  
1132 PMID: WOS:000174286400009.
- 1133 53. Degroot A, Parent MB. Increasing acetylcholine levels in the hippocampus or entorhinal  
1134 cortex reverses the impairing effects of septal GABA receptor activation on spontaneous  
1135 alternation. *Learning & Memory*. 2000;7(5):293-302. doi: 10.1101/lm.32200. PubMed PMID:  
1136 WOS:000168802100008.
- 1137 54. Parent MB, Laurey PT, Wilkniss S, Gold PE. Intraseptal infusions of muscimol impair  
1138 spontaneous alternation performance: Infusions of glucose into the hippocampus, but not the  
1139 medial septum, reverse the deficit. *Neurobiology of Learning and Memory*. 1997;68(1):75-85.  
1140 doi: 10.1006/nlme.1997.3769. PubMed PMID: WOS:A1997XE32500009.
- 1141 55. Vicari S, Bellucci S, Carlesimo GA. Visual and spatial long-term memory: differential  
1142 pattern of impairments in Williams and Down syndromes. *Dev Med Child Neurol*.  
1143 2005;47(5):305-11. PubMed PMID: 15892372.
- 1144 56. Guedj F, Sebric C, Rivals I, Ledru A, Paly E, Bizot JC, et al. Green Tea Polyphenols  
1145 Rescue of Brain Defects Induced by Overexpression of DYRK1A. *Plos One*. 2009;4(2). doi:  
1146 10.1371/journal.pone.0004606. PubMed PMID: WOS:000265487500011.
- 1147 57. De la Torre R, De Sola S, Pons M, Duchon A, de Lagran MM, Farre M, et al.  
1148 Epigallocatechin-3-gallate, a DYRK1A inhibitor, rescues cognitive deficits in Down syndrome  
1149 mouse models and in humans. *Molecular Nutrition & Food Research*. 2014;58(2):278-88. doi:  
1150 10.1002/mnfr.201300325. PubMed PMID: WOS:000337629700007.
- 1151 58. Tasic B, Menon V, Nguyen TN, Kim TK, Jarsky T, Yao Z, et al. Adult mouse cortical  
1152 cell taxonomy revealed by single cell transcriptomics. *Nat Neurosci*. 2016;19(2):335-46. Epub  
1153 2016/01/04. doi: 10.1038/nn.4216. PubMed PMID: 26727548; PubMed Central PMCID:  
1154 PMCPMC4985242.
- 1155 59. Altafaj X, Ortiz-Abalia J, Fernandez M, Potier MC, Laffaire J, Andreu N, et al.  
1156 Increased NR2A expression and prolonged decay of NMDA-induced calcium transient in  
1157 cerebellum of TgDyrk1A mice, a mouse model of Down syndrome. *Neurobiology of Disease*.  
1158 2008;32(3):377-84. doi: 10.1016/j.nbd.2008.07.024. PubMed PMID: WOS:000261602500006.
- 1159 60. Kleschevnikov AM, Belichenko PV, Villar AJ, Epstein CJ, Malenka RC, Mobley WC.  
1160 Hippocampal long-term potentiation suppressed by increased inhibition in the Ts65Dn mouse,  
1161 a genetic model of Down syndrome. *Journal of Neuroscience*. 2004;24(37):8153-60. doi:  
1162 10.1523/jneurosci.1766-04.2004. PubMed PMID: WOS:000223884400018.
- 1163 61. Best TK, Siarey RJ, Galdzicki Z. Ts65Dn, a mouse model of Down syndrome, exhibits  
1164 increased GABAB-induced potassium current. *J Neurophysiol*. 2007;97(1):892-900. Epub  
1165 2006/11/08. doi: 10.1152/jn.00626.2006. PubMed PMID: 17093127.
- 1166 62. Best TK, Cramer NP, Chakrabarti L, Haydar TF, Galdzicki Z. Dysfunctional  
1167 hippocampal inhibition in the Ts65Dn mouse model of Down syndrome. *Exp Neurol*.  
1168 2012;233(2):749-57. Epub 2011/12/08. doi: 10.1016/j.expneurol.2011.11.033. PubMed PMID:  
1169 22178330; PubMed Central PMCID: PMCPMC4123861.
- 1170 63. Wu DF, Koch T, Liang YJ, Stumm R, Schulz S, Schröder H, et al. Membrane  
1171 glycoprotein M6a interacts with the micro-opioid receptor and facilitates receptor endocytosis  
1172 and recycling. *J Biol Chem*. 2007;282(30):22239-47. Epub 2007/06/04. doi:  
1173 10.1074/jbc.M700941200. PubMed PMID: 17548356.
- 1174 64. Kim E, Cho KO, Rothschild A, Sheng M. Heteromultimerization and NMDA receptor-  
1175 clustering activity of Chapsyn-110, a member of the PSD-95 family of proteins. *Neuron*.  
1176 1996;17(1):103-13. doi: 10.1016/s0896-6273(00)80284-6. PubMed PMID: 8755482.

- 1177 65. Camp AJ, Wijesinghe R. Calretinin: modulator of neuronal excitability. *Int J Biochem*  
1178 *Cell Biol.* 2009;41(11):2118-21. Epub 2009/05/18. doi: 10.1016/j.biocel.2009.05.007. PubMed  
1179 PMID: 19450707.
- 1180 66. Gass N, Becker R, Sack M, Schwarz AJ, Reinwald J, Cosa-Linan A, et al. Antagonism  
1181 at the NR2B subunit of NMDA receptors induces increased connectivity of the prefrontal and  
1182 subcortical regions regulating reward behavior. *Psychopharmacology.* 2018;235(4):1055-68.  
1183 doi: 10.1007/s00213-017-4823-2. PubMed PMID: WOS:000428421300011.
- 1184 67. Wang DH, Jacobs SA, Tsien JZ. Targeting the NMDA receptor subunit NR2B for  
1185 treating or preventing age-related memory decline. *Expert Opinion on Therapeutic Targets.*  
1186 2014;18(10):1121-30. doi: 10.1517/14728222.2014.941286. PubMed PMID:  
1187 WOS:000342604900003.
- 1188 68. Goebel DJ, Poosch MS. NMDA receptor subunit gene expression in the rat brain: a  
1189 quantitative analysis of endogenous mRNA levels of NR1(Com), NR2A, NR2B, NR2C, NR2D  
1190 and NR3A. *Molecular Brain Research.* 1999;69(2):164-70. PubMed PMID:  
1191 WOS:000080836600002.
- 1192 69. Cull-Candy S, Brickley S, Farrant M. NMDA receptor subunits: diversity, development  
1193 and disease. *Current Opinion in Neurobiology.* 2001;11(3):327-35. doi: 10.1016/s0959-  
1194 4388(00)00215-4. PubMed PMID: WOS:000169286200009.
- 1195 70. Loftis JM, Janowsky A. The N-methyl-D-aspartate receptor subunit NR2B: localization,  
1196 functional properties, regulation, and clinical implications. *Pharmacology & Therapeutics.*  
1197 2003;97(1):55-85. doi: 10.1016/s0163-7258(02)00302-9. PubMed PMID:  
1198 WOS:000180383800003.
- 1199 71. Liu LD, Wong TP, Pozza MF, Lingenhoehl K, Wang YS, Sheng M, et al. Role of  
1200 NMDA receptor subtypes in governing the direction of hippocampal synaptic plasticity.  
1201 *Science.* 2004;304(5673):1021-4. doi: 10.1126/science.1096615. PubMed PMID:  
1202 WOS:000221383300052.
- 1203 72. Fox CJ, Russell KI, Wang YT, Christie BR. Contribution of NR2A and NR2B NMDA  
1204 subunits to bidirectional synaptic plasticity in the hippocampus in vivo. *Hippocampus.*  
1205 2006;16(11):907-15. doi: 10.1002/hipo.20230. PubMed PMID: WOS:000241833500001.
- 1206 73. Bartlett TE, Bannister NJ, Collett VJ, Dargan SL, Massey PV, Bortolotto ZA, et al.  
1207 Differential roles of NR2A and NR2B-containing NMDA receptors in LTP and LTD in the  
1208 CA1 region of two-week old rat hippocampus. *Neuropharmacology.* 2007;52(1):60-70. doi:  
1209 10.1016/j.neuropharm.2006.07.013. PubMed PMID: WOS:000243698200007.
- 1210 74. Grau C, Arato K, Fernandez-Fernandez JM, Valderrama A, Sindreu C, Fillat C, et al.  
1211 DYRK1A-mediated phosphorylation of GluN2A at Ser(1048) regulates the surface expression  
1212 and channel activity of GluN1/GluN2A receptors. *Frontiers in Cellular Neuroscience.* 2014;8.  
1213 doi: 10.3389/fncel.2014.00331. PubMed PMID: WOS:000344534900001.
- 1214 75. Li Z, Yu T, Morishima M, Pao A, LaDuca J, Conroy J, et al. Duplication of the entire  
1215 22.9 Mb human chromosome 21 syntenic region on mouse chromosome 16 causes  
1216 cardiovascular and gastrointestinal abnormalities. *Hum Mol Genet.* 2007;16(11):1359-66. Epub  
1217 2007/04/05. doi: 10.1093/hmg/ddm086. PubMed PMID: 17412756.
- 1218 76. Monory K, Massa F, Egertová M, Eder M, Blaudzun H, Westenbroek R, et al. The  
1219 endocannabinoid system controls key epileptogenic circuits in the hippocampus. *Neuron.*  
1220 2006;51(4):455-66. doi: 10.1016/j.neuron.2006.07.006. PubMed PMID: 16908411; PubMed  
1221 Central PMCID: PMC1769341.
- 1222 77. Rodriguez CI, Buchholz F, Galloway J, Sequerra R, Kasper J, Ayala R, et al. High-  
1223 efficiency deleter mice show that FLPe is an alternative to Cre-loxP. *Nature Genetics.*  
1224 2000;25(2):139-40. doi: 10.1038/75973. PubMed PMID: WOS:000087459200007.
- 1225 78. Jacquot S, Chartoire N, Piguet F, Hérault Y, Pavlovic G. Optimizing PCR for Mouse  
1226 Genotyping: Recommendations for Reliable, Rapid, Cost Effective, Robust and Adaptable to

- 1227 High-Throughput Genotyping Protocol for Any Type of Mutation. *Curr Protoc Mouse Biol.*  
1228 2019;9(4):e65. doi: 10.1002/cpmo.65. PubMed PMID: 31756054.
- 1229 79. Lindner L, Cayrou P, Jacquot S, Birling MC, Herault Y, Pavlovic G. Reliable and robust  
1230 droplet digital PCR (ddPCR) and RT-ddPCR protocols for mouse studies. *Methods.* 2020. Epub  
1231 2020/07/25. doi: 10.1016/j.ymeth.2020.07.004. PubMed PMID: 32721466.
- 1232 80. Huggett JF, Group d. The Digital MIQE Guidelines Update: Minimum Information for  
1233 Publication of Quantitative Digital PCR Experiments for 2020. *Clin Chem.* 2020;66(8):1012-  
1234 29. doi: 10.1093/clinchem/hvaa125. PubMed PMID: 32746458.
- 1235 81. Mikhaleva A, Kannan M, Wagner C, Yalcin B. Histomorphological Phenotyping of the  
1236 Adult Mouse Brain. *Curr Protoc Mouse Biol.* 2016;6(3):307-32. Epub 2016/09/01. doi:  
1237 10.1002/cpmo.12. PubMed PMID: 27584555.
- 1238 82. Dubos A, Meziane H, Iacono G, Curie A, Riet F, Martin C, et al. A new mouse model  
1239 of ARX dup24 recapitulates the patients' behavioral and fine motor alterations. *Hum Mol Genet.*  
1240 2018;27(12):2138-53. doi: 10.1093/hmg/ddy122. PubMed PMID: 29659809; PubMed Central  
1241 PMCID: PMC5985730.
- 1242 83. Arbogast T, Iacono G, Chevalier C, Afinowi NO, Houbaert X, van Eede MC, et al.  
1243 Mouse models of 17q21.31 microdeletion and microduplication syndromes highlight the  
1244 importance of *Kansl1* for cognition. *PLoS Genet.* 2017;13(7):e1006886. Epub 2017/07/13. doi:  
1245 10.1371/journal.pgen.1006886. PubMed PMID: 28704368; PubMed Central PMCID:  
1246 PMC5531616.
- 1247 84. Marechal D, Brault V, Leon A, Martin D, Lopes Pereira P, Loaëc N, et al. *Cbs*  
1248 overdosage is necessary and sufficient to induce cognitive phenotypes in mouse models of  
1249 Down syndrome and interacts genetically with *Dyrk1a*. *Hum Mol Genet.* 2019;28(9):1561-77.  
1250 doi: 10.1093/hmg/ddy447. PubMed PMID: 30649339.
- 1251
- 1252
